# Supplementary material
Source: publisher figshare collection journal article supplement (https://microbiology.figshare.com/articles/dataset/_/1545552)
Supplement: Supplementary file 1 [file 1]

Archive with 11 entries (11 files):
- File_S1_tale_exporter_output_bls256.pdf
- File_S2_tal2b_traces.pdf
- File_S3_PXO99A_tal_Southern.pdf
- File_S4_unique_regions_xoc.rtf
- File_S5_unique_regions_xoo.rtf
- File_S6_5_dup_alignment.rtf
- File_S7_3_alignment.rtf
- File_S8_5_del_alignment.rtf
- File_S9_5_transposon_alignment.rtf
- File_S10_discussion_tal_relationships.pdf
- File_S11_HGAP3_methods.pdf
