# Supplementary material
Source: publisher figshare collection journal article supplement (https://microbiology.figshare.com/articles/dataset/_/1545552)
Supplement: Supplementary file 1 [file 1 › File_S1_tale_exporter_output_bls256.pdf]

# Supplementary Material for

## SMRT SEQUENCING OF *XANTHOMONAS ORYZAE* GENOMES REVEALS A DYNAMIC STRUCTURE AND COMPLEX TAL EFFECTOR GENE RELATIONSHIPS

Nicholas J. Booher<sup>1</sup>, Sara C. D. Carpenter<sup>1</sup>, Robert P. Sebra<sup>2</sup>, Li Wang<sup>1</sup>, Steven L. Salzberg<sup>3</sup>, Jan E. Leach<sup>4</sup>, and Adam J. Bogdanove<sup>1\*</sup>

Address: <sup>1</sup> Plant Pathology and Plant-Microbe Biology Section, School of Integrative Plant Science, Cornell University, Ithaca, NY 14853 USA; <sup>2</sup> Icahn Institute for Genomics and Multiscale Biology and Department of Genetics & Genomic Sciences, Icahn School of Medicine at Mount Sinai, New York, NY 10029 USA; <sup>3</sup> Departments of Biomedical Engineering, Computer Science, and Biostatistics and Center for Computational Biology, Johns Hopkins University, Baltimore, MD 21205 USA; <sup>4</sup> Bioagricultural Sciences and Pest Management, Colorado State University, Ft. Collins, CO 80523 USA

\*Corresponding author: [ajb7@cornell.edu](mailto:ajb7@cornell.edu)

**File S1. Representative output from the *tal* gene RVD sequence exporter for a set of assemblies of the BLS256 *tal* genes.** Sequences are listed in alphabetical order with the number of occurrences on the left to facilitate picking maximal length sequences. An exclamation point indicates a repeat of atypical size, hash indicates the exporter could not find the conserved residues flanking the RVDs, and "[ ]->" indicates a likely frameshift as judged by lack of conserved residues and by sequence length.

```
19 [ ]->
  6 HD [ ]->
  2 HD #
  2 HD HD [ ]->
  4 HD HD HD HD HD [ ]->
  1 HD HD HD HD HD NG HD [ ]->
23 HD HD HD HD HD NG HD NN HD ND NG NG NN HG ND ND HD NG
12 HD HD HD HD HD NG HD NN HD NG HG NN HD N* NG NG
12 HD HD NC HD NC NG HD HH HD NI NG N* NS N* HD HD NS NI HG HD NG
  1 HD HD NG NI HG HD HG [ ]->
  1 HD HD NG NI HG HD HG NI HD [ ]->
  1 HD HD NG NI HG HD HG NI HD NN HD HG HG HG [ ]->
10 HD HD NG NI HG HD HG NI HD NN HD HG HG HG NG NI NG
  8 HD HD NN NN NG N* HD NI NG HD NG NS HD HA ND N* ND NN HD NN NN HD HD N*
NN NG HD
  4 HD HG HD [ ]->
18 HD HG HD HG N* NN NG HD NN HD NG NG NN HD N* NG NG
  1 HD NN HD [ ]->
32 HD NN HD N* NS NN HG NI NI NS NI NG HD NN HD HD NG HG NG
12 HH NN HD HD NG N* HD NN HD ND N* NG NS NS NN HD HD NG
  4 NI [ ]->
```

1 NI HG [ ]->  
12 NI HG NI N\* HN NG NN ND HD NG HD NI HG HG HD NN HD HH N\* HD NN NN NG HD  
NN NN NG NN NI NG  
12 NI HG N\* NN N\* HD HG HD NN HD NK HG NN NN NG HD  
11 NI NG NI NG NN NG NN NG HD NN NN HG HD NN NS NN HD HD NG NA NN HD HD HD  
HD N\*  
2 NI NN [ ]->  
24 NI NN HN NN NI! NG HD NN HD HG HD HG HD HD NG  
24 NI N\* NI NI NN N\* NI NK HD HD HD NG NI NN HD NN HD NG  
2 NI NN NI [ ]->  
12 NI NN NI NI NG HD NG NN NI NN NI NN HD  
13 NI NN NI NI NI NI N\* NI NG NN NN NN NI NS NG NG  
5 NN [ ]->  
20 NN HD HD HH NN NG NS NG HD NI NG HD HH NG NG NG HA NG  
20 NN HD NI HD NN NG NG HD NN HD N\* NN HD HD HD NG  
6 NN HD NI NI [ ]->  
16 NN HD NI NI NG NN NN HD NN NI NI NN NN NN NG NI HD NG  
10 NN HD NI NI NN HA NN NS NS NI HD HA HA HA HD HD HD HA HD N\*  
4 NN HD NI NK HD [ ]->  
2 NN HD NI NK HD HD [ ]->  
4 NN HD NI NK HD HD HD NG NI [ ]->  
2 NN HD NI NK HD HD HD NG NI NN HD!  
2 NN HD NI NK HD HD HD NG NI NN HD HD!  
26 NN HD NI NK HD HD HD NG NI NN HD HD NG  
18 NN HD NS NG HD NN HD NI HD NN HD NN HD NN HD NN NN NN NN NN NN NN HD NG  
22 NN NG HD NG HD HD NI NH HG NI NN NN HD NS NG NN HD NG NG N\*  
1 NN NN ND N\* NS NS [ ]->  
14 NN NN ND N\* NS NS YG NI SN HD HD NG HD NS NN HD NG  
16 NN NS NG NI HD HD NG NN HD NI NG N\* N\* NG HD HD NS NI NN NG NG  
26 NS HD NI N\* NI HG NI NI N\* NG HD NN NI NG HD NN NS NN NG NN  
14 NS HG NI NG NS NN ND N\* NG N\* HN NN HD NS NI NN HD HD NG NG HG HD NG  
19 NS HG NI NG NS NN NG NN NG HD NN HD HD NG  
1 NS ND HG HG [ ]->  
1 NS ND HG HG HG [ ]->  
22 NS ND HG HG HG NG! HG HG HD HD HD NN NN HD HG HH H\* H\* NN HD H\*
