# Supplementary material
Source: publisher figshare collection journal article supplement (https://microbiology.figshare.com/articles/dataset/_/1545552)

# Supplementary Material for

## SMRT SEQUENCING OF *XANTHOMONAS* *ORYZAE* GENOMES REVEALS A DYNAMIC STRUCTURE AND COMPLEX TAL EFFECTOR GENE RELATIONSHIPS

Nicholas J. Booher<sup>1</sup>, Sara C. D. Carpenter<sup>1</sup>, Robert P. Sebra<sup>2</sup>, Li Wang<sup>1</sup>, Steven L. Salzberg<sup>3</sup>, Jan E. Leach<sup>4</sup>, and Adam J. Bogdanove<sup>1\*</sup>

Address: <sup>1</sup> Plant Pathology and Plant-Microbe Biology Section, School of Integrative Plant Science, Cornell University, Ithaca, NY 14853 USA; <sup>2</sup> Icahn Institute for Genomics and Multiscale Biology and Department of Genetics & Genomic Sciences, Icahn School of Medicine at Mount Sinai, New York, NY 10029 USA; <sup>3</sup> Departments of Biomedical Engineering, Computer Science, and Biostatistics and Center for Computational Biology, Johns Hopkins University, Baltimore, MD 21205 USA; <sup>4</sup> Bioagricultural Sciences and Pest Management, Colorado State University, Ft. Collins, CO 80523 USA

\*Corresponding author: [ajb7@cornell.edu](mailto:ajb7@cornell.edu)

**File S2. Traces of Sanger reads aligned to *tal2b* in the BLS256 reference genome assembly.** In the first (top) and fourth trace the coordinate marker in the middle indicates the site of the frameshift call. The second and third traces appear to be corrupted and do not contain coordinates. The fourth trace is on the opposite strand from the rest.

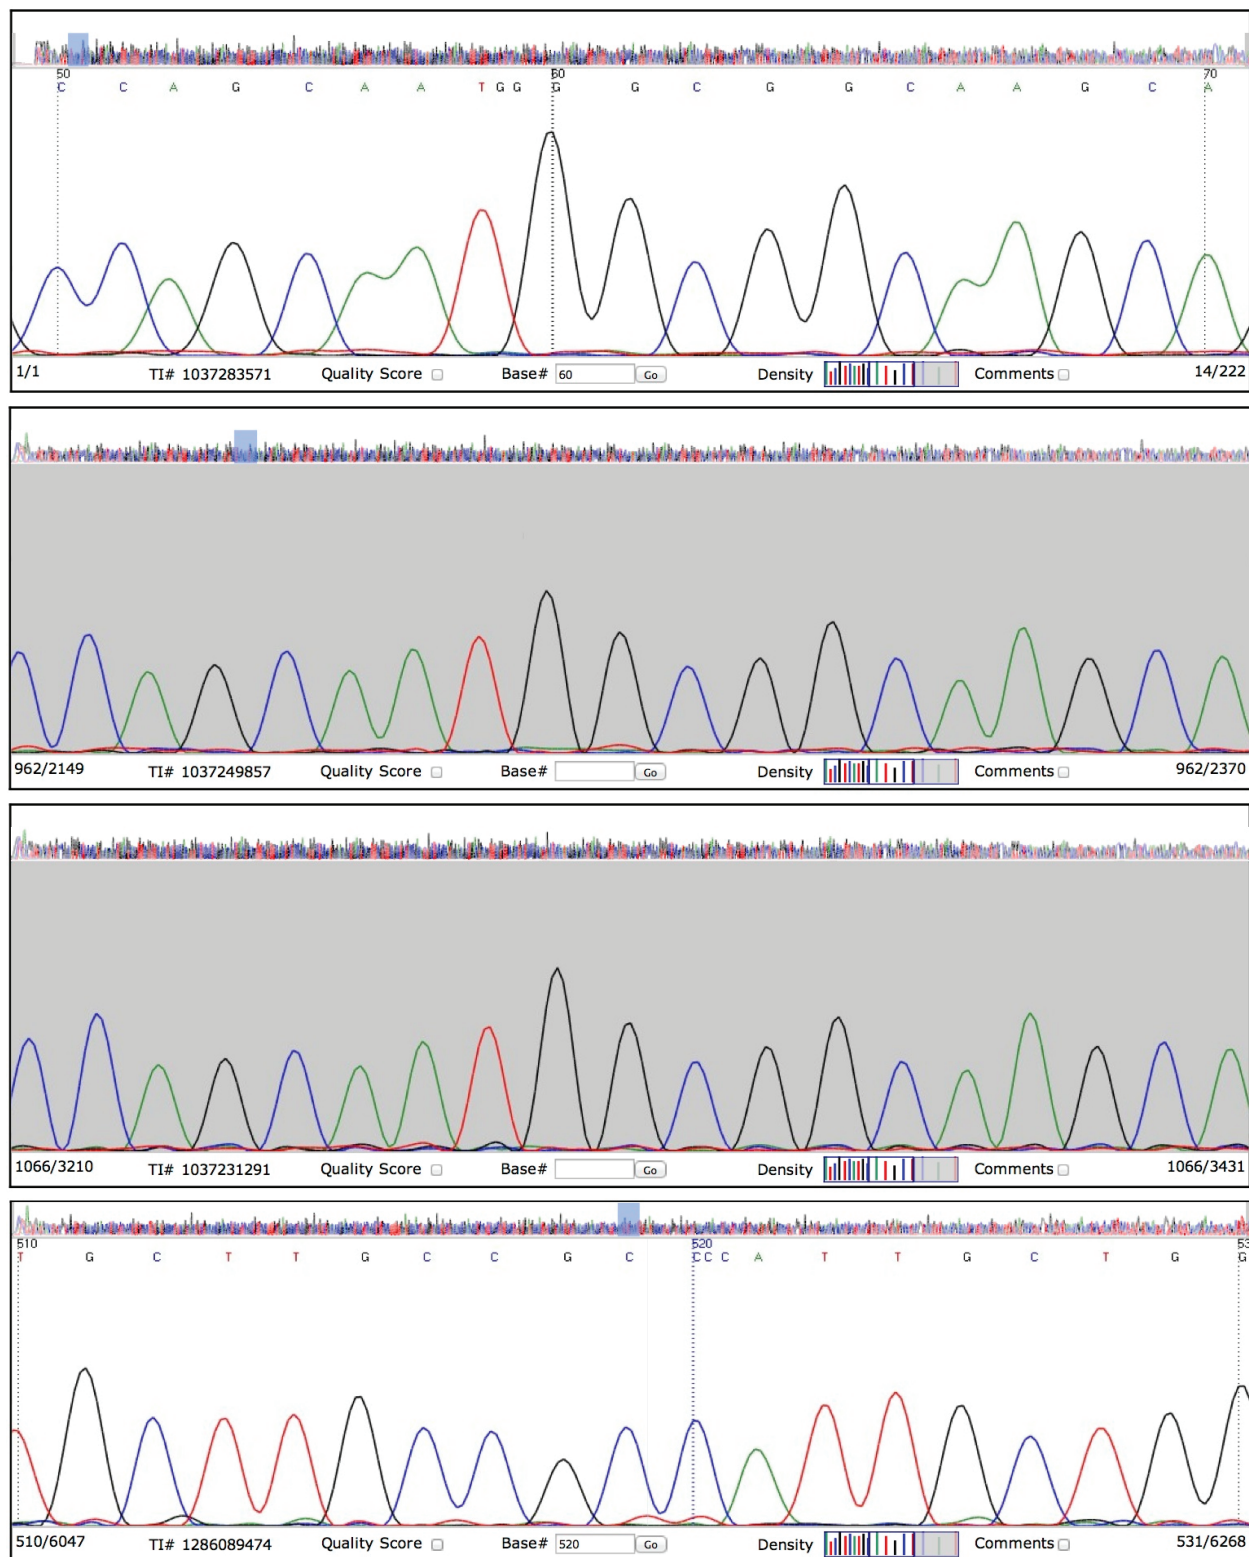

Supplement: Supplementary file 1 [file 1 › File_S2_tal2b_traces.pdf]
