# Supplementary material
Source: publisher figshare collection journal article supplement (https://microbiology.figshare.com/articles/dataset/_/1545552)

# Supplementary Material for

## SMRT SEQUENCING OF *XANTHOMONAS ORYZAE* GENOMES REVEALS A DYNAMIC STRUCTURE AND COMPLEX TAL EFFECTOR GENE RELATIONSHIPS

Nicholas J. Booher<sup>1</sup>, Sara C. D. Carpenter<sup>1</sup>, Robert P. Sebra<sup>2</sup>, Li Wang<sup>1</sup>, Steven L. Salzberg<sup>3</sup>, Jan E. Leach<sup>4</sup>, and Adam J. Bogdanove<sup>1\*</sup>

Address: <sup>1</sup> Plant Pathology and Plant-Microbe Biology Section, School of Integrative Plant Science, Cornell University, Ithaca, NY 14853 USA; <sup>2</sup> Icahn Institute for Genomics and Multiscale Biology and Department of Genetics & Genomic Sciences, Icahn School of Medicine at Mount Sinai, New York, NY 10029 USA; <sup>3</sup> Departments of Biomedical Engineering, Computer Science, and Biostatistics and Center for Computational Biology, Johns Hopkins University, Baltimore, MD 21205 USA; <sup>4</sup> Bioagricultural Sciences and Pest Management, Colorado State University, Ft. Collins, CO 80523 USA

\*Corresponding author: [ajb7@cornell.edu](mailto:ajb7@cornell.edu)

**File S3. Southern blot confirming the internal deletion in *tal7b* or *tal8b* of PXO99A.** The blot was prepared using *SphI*-digested genomic DNA of the sequenced PXO99A accession (PXO99A-s) and another accession of PXO99A that lacks the 212 kb duplication (PXO99A-B; see text). The blot was probed with the *SphI* fragment of *avrXa7* using the AlkPhos Direct Labeling and Detection System with CDP-Star (GE Healthcare Life Sciences, Pittsburgh, PA) according to manufacturer's directions. Arrows mark the *SphI* fragment of the full length *tal7b* or *tal8b* gene and that of the gene with the internal deletion. Note that the *SphI* fragment of the full-length gene co-migrates with those of *tal6a* and *tal9a*, which have the same number of repeats.

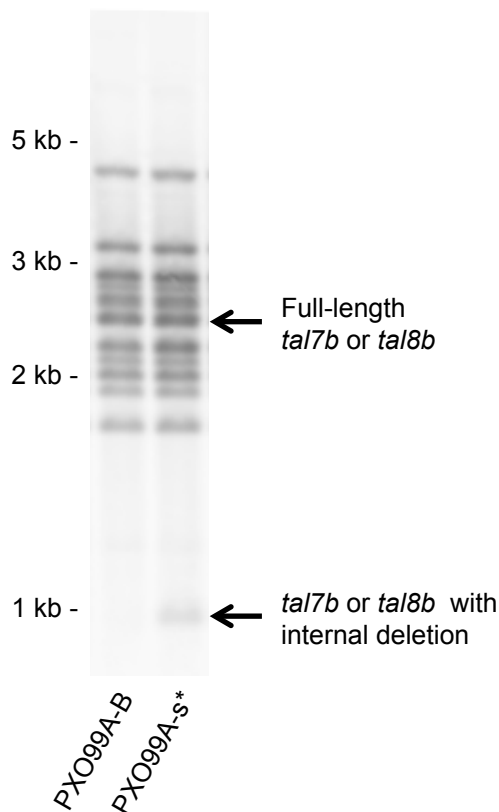

Supplement: Supplementary file 1 [file 1 › File_S3_PXO99A_tal_Southern.pdf]
