# Supplementary material
Source: publisher figshare collection journal article supplement (https://microbiology.figshare.com/articles/dataset/_/1545552)
Supplement: Supplementary file 1 [file 1 › File_S4_unique_regions_xoc.rtf]

Supplementary Material 
for

SMRT SEQUENCING OF XANTHOMONAS ORYZAE GENOMES REVEALS A DYNAMIC STRUCTURE AND COMPLEX TAL EFFECTOR GENE RELATIONSHIPS
Nicholas J. Booher1, Sara C. D. Carpenter1, Robert P. Sebra2, Li Wang1, Steven L. Salzberg3, Jan E. Leach4, and Adam J. Bogdanove1*
Address: 1 Plant Pathology and Plant-Microbe Biology Section, School of Integrative Plant Science, Cornell University, Ithaca, NY 14853 USA; 2 Icahn Institute for Genomics and Multiscale Biology and Department of Genetics & Genomic Sciences, Icahn School of Medicine at Mount Sinai, New York, NY 10029 USA; 3 Departments of Biomedical Engineering, Computer Science, and Biostatistics and Center for Computational Biology, Johns Hopkins University, Baltimore, MD 21205 USA; 4 Bioagricultural Sciences and Pest Management, Colorado State University, Ft. Collins, CO 80523 USA
*Corresponding author:  ajb7@cornell.edu


File S4. Genomic regions respectively unique to BLS256 or CFBP7342. Regions unique to each genome were determined by aligning the other genomes to it with Nucmer 3.1 (Kurtz et al., 2004), using delta-filter (Kurtz et al., 2004) to filter to a many-to-many alignment allowing rearrangements, getting the complement of the aligned regions using bedtools 2.17 (Quinlan & Hall, 2010), and filtering the results to those 100 bp or longer. The coordinates and length of each unique region are given, followed by the product name, coordinates, and strand of any annotated protein coding sequences overlapping the region.

Regions unique to BLS256 when compared to CFBP7342:

Region 0, 19236-19739 (503):

site-specific DNA methylase	19475	19751	+

Region 1, 27341-31250 (3909):

regulatory protein cII, putative	27404	28757	-
sensor kinase	29460	31011	-

Region 2, 35825-35932 (107):
Region 3, 36080-38975 (2895):

Hypothetical protein	36319	37402	+
hypothetical protein	38128	38275	-
conserved hypothetical protein	38524	38704	+

Region 4, 40045-43479 (3434):

membrane-fusion protein, putative	40060	41329	+
colicin V secretion ABC transporter ATP-binding protein	41325	43428	+

Region 5, 90402-90518 (116):
Region 6, 93234-93957 (723):

hypothetical protein	93723	94419	-

Region 7, 110167-113330 (3163):

exodeoxyribonuclease V, gamma subunit	106769	110183	-
hemagglutinin	110535	111495	-
microcystin dependent protein	111517	111658	+
microcystin dependent protein	111654	111816	+
acetyltransferase	111820	112378	+
conserved hypothetical protein	112396	112684	-
hypothetical protein	112682	112865	+
ABC transporter ATP-binding protein	113068	113863	+

Region 8, 125677-129127 (3450):

EF hand domain protein	126499	129109	-

Region 9, 175198-181065 (5867):

conserved hypothetical protein	175377	176022	-
LasA	176193	177012	-
conserved hypothetical protein	177183	177657	+
proline-betaine transporter	178015	179263	-
thioredoxin	179967	180240	-
AtsE	180260	180659	-
esterase	180728	180959	-
conserved hypothetical protein	180955	181204	-

Region 10, 224827-225444 (617):

conserved hypothetical protein	224951	225230	+

Region 11, 226965-227462 (497):
Region 12, 228534-228683 (149):
Region 13, 234362-234666 (304):

ISXo8 transposase, IS4 family	232966	234394	-

Region 14, 236435-236710 (275):
Region 15, 255746-255967 (221):
Region 16, 302192-302312 (120):
Region 17, 419848-420833 (985):

5'-nucleotidase	419844	420804	-

Region 18, 513958-516758 (2800):

conserved hypothetical protein	513965	516209	-

Region 19, 631103-631324 (221):

prolyl oligopeptidase family protein	630646	632083	+

Region 20, 718116-718660 (544):

Rhs element Vgr protein	717511	718720	+

Region 21, 1050490-1053031 (2541):

plasmid mobilization protein	1050487	1050730	-
MchC protein	1051341	1053039	+

Region 22, 1187384-1189609 (2225):

putative transcriptional regulator, TetR family	1187289	1188048	+
conserved hypothetical protein	1188377	1188908	+
conserved hypothetical protein	1188918	1189245	+
conserved hypothetical protein	1189256	1189943	+

Region 23, 1190530-1191066 (536):

type I restriction enzyme StySJI specificity protein	1190290	1191655	-

Region 24, 1191175-1191629 (454):

type I restriction enzyme StySJI specificity protein	1190290	1191655	-

Region 25, 1204321-1204860 (539):

type I restriction-modification system, S subunit	1204180	1206484	+

Region 26, 1301199-1302901 (1702):

conserved hypothetical protein	1301342	1302755	+
Rhs element Vgr protein	1302899	1305188	+

Region 27, 1316418-1318032 (1614):

EF hand domain protein	1317269	1320206	-

Region 28, 1353875-1358703 (4828):

Rhs element Vgr protein	1351213	1353973	+
conserved hypothetical protein	1354243	1354969	+
hypothetical protein	1354959	1355538	-
conserved hypothetical protein	1354980	1357965	+

Region 29, 1359055-1361861 (2806):
Region 30, 1371454-1371670 (216):

hypothetical protein	1371242	1371686	+

Region 31, 1379092-1379265 (173):
Region 32, 1509735-1512031 (2296):

conserved hypothetical protein	1509363	1510104	+
conserved hypothetical protein	1510498	1511047	+

Region 33, 1517485-1517886 (401):
Region 34, 1914113-1915206 (1093):

conserved hypothetical protein	1912669	1915045	+

Region 35, 1939489-1939767 (278):

phospholipase A1, putative	1939187	1939793	-

Region 36, 1946125-1946258 (133):
Region 37, 2198819-2200005 (1186):

conserved hypothetical protein	2199311	2199752	-

Region 38, 2201219-2201369 (150):

tannase	2201182	2202328	+

Region 39, 2230670-2231074 (404):

conserved hypothetical protein	2228831	2230691	+

Region 40, 2281927-2282613 (686):

chemotaxis protein	2282401	2284663	-

Region 41, 2283724-2285256 (1532):

chemotaxis protein	2282401	2284663	-
methyl-accepting chemotaxis protein	2285075	2287337	-

Region 42, 2302132-2304906 (2774):

chemotaxis protein	2301250	2303608	-
conserved hypothetical protein	2303636	2304386	-
methyl-accepting chemotaxis protein	2304713	2307494	-

Region 43, 2308101-2308593 (492):
Region 44, 2331042-2332403 (1361):
Region 45, 2332589-2333734 (1145):

conserved hypothetical protein	2332554	2332896	+
conserved hypothetical protein	2332988	2333309	+

Region 46, 2335088-2340818 (5730):

type III restriction-modification system methyltransferase	2335132	2337028	+
type III restriction enzyme	2337747	2340810	+

Region 47, 2342167-2343383 (1216):

conserved hypothetical protein	2342194	2342860	-

Region 48, 2526749-2527849 (1100):

conserved hypothetical protein	2527052	2527250	+
conserved hypothetical protein	2527277	2528006	+

Region 49, 2532132-2532825 (693):
Region 50, 2533421-2534568 (1147):

2-oxoglutarate-dependent ethylene-succinate-forming enzyme	2533499	2534501	+

Region 51, 2536433-2537620 (1187):

conserved hypothetical protein	2536480	2537167	-

Region 52, 2578616-2579266 (650):
Region 53, 2580348-2581031 (683):

ClpB	2580933	2583639	-

Region 54, 2593941-2595113 (1172):

conserved hypothetical protein	2593867	2594713	+
conserved hypothetical protein	2594752	2597599	+

Region 55, 2595429-2595770 (341):

conserved hypothetical protein	2594752	2597599	+

Region 56, 2597305-2597945 (640):

conserved hypothetical protein	2594752	2597599	+
conserved hypothetical protein	2597704	2598631	+

Region 57, 2598670-2598888 (218):

conserved hypothetical protein	2598703	2600710	+

Region 58, 2600415-2601089 (674):

conserved hypothetical protein	2598703	2600710	+
conserved hypothetical protein	2600718	2601750	+

Region 59, 2601789-2602009 (220):

conserved hypothetical protein	2601822	2603838	+

Region 60, 2603566-2604166 (600):

conserved hypothetical protein	2601822	2603838	+
conserved hypothetical protein	2603952	2604864	+

Region 61, 2604903-2605121 (218):

conserved hypothetical protein	2604936	2605404	+

Region 62, 2684401-2686860 (2459):

RND superfamily protein	2684411	2687480	-

Region 63, 2694733-2695641 (908):

integrase	2694811	2695657	+

Region 64, 2696703-2697889 (1186):
Region 65, 2705964-2713474 (7510):

colicin V secretion-processing ATP-binding protein CvaB	2705981	2708171	-
putative secretion protein	2708187	2709483	-
membrane translocator, putative	2710291	2712937	-

Region 66, 2926060-2926356 (296):

hypothetical protein	2926258	2926372	+

Region 67, 2927524-2928887 (1363):

hypothetical protein	2928074	2928203	-
conserved hypothetical protein	2928456	2929254	-

Region 68, 3041210-3041916 (706):

integral membrane protein	3041343	3042072	-

Region 69, 3145120-3147278 (2158):

transposase	3145817	3146810	-

Region 70, 3325471-3325586 (115):

TonB-dependent receptor	3324490	3327202	+

Region 71, 3341588-3341999 (411):

hypothetical protein	3341985	3342105	+

Region 72, 3342432-3344131 (1699):
Region 73, 3366273-3366776 (503):

site-specific DNA methylase	3366512	3366788	+

Region 74, 3370968-3371406 (438):

hypothetical protein	3370261	3371452	+

Region 75, 3545233-3546569 (1336):

RhsD protein	3545175	3550020	-

Region 76, 3599119-3600297 (1178):

chemotaxis protein	3597892	3599647	+
conserved protein YuxK	3599798	3600233	-
conserved hypothetical protein	3600219	3600609	-

Region 77, 3627016-3627927 (911):

RhsD protein	3624579	3627546	+

Region 78, 3652475-3653587 (1112):

site-specific recombinase, phage integrase family	3652405	3652987	+
phage-related protein	3652990	3653413	+

Region 79, 3665565-3668721 (3156):

carboxylesterase	3665536	3666361	-
tRNA-rRNA methyltransferase	3666625	3667687	-
hypothetical protein	3667797	3667920	-
acetyltransferase	3667919	3668057	-
acetyltransferase	3668053	3668191	-
hypothetical protein	3668146	3668311	+
hypothetical protein	3668502	3668724	+

Region 80, 3784299-3784736 (437):

transcriptional regulator	3783294	3785775	+

Region 81, 3917554-3918197 (643):

general secretion pathway protein D	3917421	3919710	-

Region 82, 3996762-3997154 (392):
Region 83, 4034809-4035353 (544):

conserved hypothetical protein	4034652	4035801	-

Region 84, 4039641-4048989 (9348):

ABC transporter permease	4038833	4040195	+
ABC transporter ATP-binding protein	4040243	4040963	+
ABC transporter permease	4040974	4042276	+
ABC transporter permease	4042332	4043559	+
ABC transporter permease	4043601	4044930	+
ABC transporter permease	4044929	4046165	+
two-component system response regulator protein	4046274	4047618	+
two-component system sensor protein	4047614	4048973	+

Region 85, 4132078-4133735 (1657):

methyltransferase	4131747	4133211	-
two-component system response regulator protein	4133355	4133736	+
conserved hypothetical protein	4133729	4133972	-

Region 86, 4188613-4189278 (665):
Region 87, 4190442-4191906 (1464):

filamentous hemagglutinin	4190875	4196920	-

Region 88, 4192803-4193730 (927):

filamentous hemagglutinin	4190875	4196920	-

Region 89, 4197518-4199651 (2133):

conserved hypothetical protein	4197642	4197906	+
hypothetical protein	4197890	4198019	+
hypothetical protein	4198324	4198441	-
filmentous hemagglutinin	4198459	4202431	-

Region 90, 4202533-4204552 (2019):

hypothetical protein	4202401	4202539	+
filamentous hemagglutinin	4203355	4211800	-

Region 91, 4212012-4214127 (2115):

conserved hypothetical protein	4212138	4212417	+
hypothetical protein	4212535	4212664	-
filamentous hemagglutinin	4212941	4224182	-

Region 92, 4228407-4229090 (683):
Region 93, 4232262-4232421 (159):
Region 94, 4239270-4244001 (4731):

hypothetical protein	4239264	4239378	-
hypothetical protein	4239475	4239733	-
ABC transporter permease	4239752	4241000	-
ABC transporter permease	4240996	4242304	-
hypothetical protein	4242316	4242907	-
conserved hypothetical protein	4243085	4243493	-

Region 95, 4248891-4249637 (746):

conserved hypothetical protein	4248884	4249673	-
permease	4249636	4250428	-

Region 96, 4328685-4329808 (1123):

conserved hypothetical protein	4328409	4329603	+

Region 97, 4387730-4388552 (822):

acyltransferase	4386863	4387991	-
integrase, catalytic region	4388001	4388595	-

Region 98, 4418747-4419060 (313):
Region 99, 4461780-4462135 (355):

tRNA-dihydrouridine synthase A	4460826	4461831	-

Region 100, 4515601-4515865 (264):
Region 101, 4517350-4517653 (303):
Region 102, 4532459-4532854 (395):
Region 103, 4632012-4632372 (360):

hypothetical protein	4632295	4632412	-

Region 104, 4652892-4654473 (1581):

phage integrase	4653074	4653401	-
phage integrase	4653553	4654312	-

Region 105, 4802079-4803058 (979):

restriction endonuclease	4802305	4803097	-

Regions unique to CFBP7342 when compared to BLS256:

Region 0, 91373-91537 (164):
Region 1, 196564-197408 (844):
Region 2, 216202-216550 (348):
Region 3, 221542-221668 (126):

hypothetical protein	216558	225117	-

Region 4, 312662-313965 (1303):

methylamine utilization protein	312245	313292	-

Region 5, 314472-323524 (9052):

hypothetical protein	314554	317770	+

Region 6, 326675-327261 (586):

hypothetical protein	326849	327083	+

Region 7, 407086-409237 (2151):

hypothetical protein	407999	409028	-
tRNA-dihydrouridine synthase A	409179	410190	+

Region 8, 467258-467393 (135):
Region 9, 468555-468687 (132):
Region 10, 488073-499778 (11705):

hypothetical protein	488049	488292	-
hypothetical protein	488509	489028	-
hypothetical protein	489042	489882	-
hypothetical protein	490112	491135	-
hypothetical protein	491539	491758	-
hypothetical protein	491859	492210	-
tail fiber protein	492213	492666	-
hypothetical protein	492731	493067	-
hypothetical protein	493063	493465	-
head-tail adaptor protein	493457	493790	-
hypothetical protein	493786	494203	-
hypothetical protein	494206	494431	-
capsid protein	494490	495735	-
peptidase S14	495800	496529	-
nucleoid-structuring protein H-NS	496494	497811	-
terminase	497810	499487	-
hypothetical protein	499489	499870	-

Region 11, 500371-500871 (500):

holin	499970	500381	-
hypothetical protein	500403	500679	-
hypothetical protein	500675	501092	-

Region 12, 608444-608926 (482):
Region 13, 628987-632682 (3695):

hypothetical protein	630208	630439	-
hypothetical protein	630642	630831	-
hypothetical protein	630897	631275	-
peptidase S24	631539	632232	-

Region 14, 632813-634786 (1973):

hypothetical protein	632766	633012	+
hypothetical protein	633008	633290	+
hypothetical protein	633856	634156	+
DNA helicase	634152	635508	+

Region 15, 636672-637238 (566):

hypothetical protein	636768	637236	+

Region 16, 641632-642756 (1124):

hypothetical protein	639284	642122	+
hypothetical protein	642146	642881	+

Region 17, 644761-646896 (2135):

hypothetical protein	642907	645250	+
hypothetical protein	645270	646008	+
hypothetical protein	646172	647102	+

Region 18, 652574-653790 (1216):

hypothetical protein	650733	653076	+
hypothetical protein	653103	653808	+

Region 19, 654992-655241 (249):
Region 20, 678357-678937 (580):

hypothetical protein	678358	678943	+

Region 21, 684963-686522 (1559):

hypothetical protein	685069	685411	+
hypothetical protein	685561	685858	+
hypothetical protein	685899	686211	+
hypothetical protein	686338	686554	+

Region 22, 707580-708822 (1242):
Region 23, 711200-712076 (876):

hypothetical protein	711645	711999	+

Region 24, 850869-851401 (532):

hypothetical protein	850420	851557	+

Region 25, 853208-854047 (839):

copper resistance protein CopB	852742	853819	-
copper resistance protein CopA	853815	855630	-

Region 26, 965232-965890 (658):

general secretion pathway protein GspD	963712	966022	+

Region 27, 983397-983525 (128):
Region 28, 1003723-1004082 (359):

hypothetical protein	1003679	1003895	+

Region 29, 1017454-1018168 (714):
Region 30, 1020451-1021345 (894):
Region 31, 1100631-1103277 (2646):

type IV secretion protein Rhs	1097187	1101927	+
hypothetical protein	1101907	1102318	+
hypothetical protein	1102767	1103226	+

Region 32, 1109448-1111150 (1702):
Region 33, 1164137-1165231 (1094):
Region 34, 1166799-1167268 (469):

hypothetical protein	1166847	1167417	+

Region 35, 1229902-1268972 (39070):

hypothetical protein	1230332	1231022	+
hypothetical protein	1231123	1231720	-
hypothetical protein	1231716	1232658	-
peptidase S24	1232889	1233369	+
PAAR motif family protein	1235467	1235869	+
hypothetical protein	1235817	1236375	+
hypothetical protein	1236355	1236697	+
adenine methyltransferase	1238258	1238969	-
hypothetical protein	1238967	1239156	+
Presumed portal vertex protein	1239152	1240172	-
terminase	1240171	1241935	-
phage capsid scaffolding protein	1242077	1242920	+
capsid protein	1242966	1243983	+
terminase endonuclease subunit	1243986	1244706	+
head completion/stabilization protein	1244805	1245273	+
tail protein	1245272	1245482	+
membrane protein	1245486	1245843	+
hypothetical protein	1245835	1246111	+
lysozyme	1246110	1246749	+
hypothetical protein	1246748	1247237	+
hypothetical protein	1247640	1248090	+
baseplate assembly protein	1248171	1249062	+
tail protein	1249054	1249600	+
hypothetical protein	1249609	1251115	+
tail fiber assembly protein	1251122	1251701	+
baseplate assembly protein	1251761	1252325	+
baseplate assembly protein	1252321	1252681	+
tail sheath protein	1252692	1253859	+
major tail tube protein	1253889	1254399	+
tail protein	1254443	1254746	+
P2 GpE family protein	1254754	1254868	+
tail protein	1254900	1257771	+
oxidoreductase	1257783	1258185	+
phage late control protein	1258181	1259171	+
hypothetical protein	1260563	1261001	-
hypothetical protein	1261072	1261330	+
hypothetical protein	1261452	1261653	+
hypothetical protein	1261663	1261942	+
hypothetical protein	1261938	1262151	+
hypothetical protein	1262159	1264856	+
hypothetical protein	1265167	1265386	+
hypothetical protein	1265382	1265661	+
hypothetical protein	1265886	1266297	+
hypothetical protein	1266458	1266734	+
hypothetical protein	1266730	1266976	+
hypothetical protein	1266972	1267245	+
hypothetical protein	1267241	1267448	+
hypothetical protein	1267444	1267666	+
integrase	1267665	1268850	+

Region 36, 1320573-1320725 (152):

chemotaxis protein CheY	1316458	1323532	+

Region 37, 1350033-1350436 (403):
Region 38, 1366414-1366568 (154):

TonB-dependent receptor	1364821	1367548	-

Region 39, 1546027-1546414 (387):
Region 40, 1646855-1650784 (3929):

transposase	1646939	1647341	+
transposase	1647358	1647745	+
ATP-dependent OLD family endonuclease	1647931	1649710	+

Region 41, 1652316-1689187 (36871):

hypothetical protein	1652373	1652649	-
hypothetical protein	1652914	1653139	-
hypothetical protein	1653135	1653408	-
hypothetical protein	1653569	1653977	-
hypothetical protein	1654055	1654322	-
hypothetical protein	1654318	1654597	-
hypothetical protein	1654593	1654812	-
hypothetical protein	1655135	1657832	-
hypothetical protein	1657841	1658054	-
hypothetical protein	1658050	1658329	-
hypothetical protein	1658339	1658660	-
hypothetical protein	1658991	1659429	+
phage late control protein	1660088	1661075	-
oxidoreductase	1661071	1661473	-
tail protein	1661485	1664356	-
P2 GpE family protein	1664388	1664502	-
tail protein	1664510	1664813	-
major tail tube protein	1664858	1665368	-
tail sheath protein	1665398	1666565	-
baseplate assembly protein	1666576	1666936	-
baseplate assembly protein	1666932	1667496	-
tail fiber assembly protein	1667556	1668135	-
hypothetical protein	1668142	1669648	-
tail protein	1669657	1670203	-
baseplate assembly protein	1670195	1671086	-
hypothetical protein	1672379	1672832	-
tail protein	1672819	1673239	-
hypothetical protein	1673235	1673724	-
lysozyme	1673723	1674362	-
hypothetical protein	1674361	1674637	-
membrane protein	1674629	1674986	-
tail protein	1674990	1675200	-
head completion/stabilization protein	1675199	1675667	-
terminase endonuclease subunit	1675766	1676486	-
capsid protein	1676489	1677509	-
phage capsid scaffolding protein	1677555	1678398	-
terminase	1678540	1680304	+
Presumed portal vertex protein	1680303	1681323	+
hypothetical protein	1681319	1681508	-
adenine methyltransferase	1681506	1682217	+
hypothetical protein	1682325	1682562	+
hypothetical protein	1683747	1684089	-
hypothetical protein	1684069	1684627	-
PAAR motif family protein	1684575	1684977	-
hypothetical protein	1685788	1686019	-
hypothetical protein	1686018	1686318	-
hypothetical protein	1686563	1687085	-
integrase	1687430	1689221	-
ribosomal protein S12 methylthiotransferase	1689150	1690512	+

Region 42, 1921536-1921725 (189):

hypothetical protein	1921516	1921756	-

Region 43, 1924760-1925852 (1092):

hypothetical protein	1924602	1925334	-
hypothetical protein	1925362	1928197	-

Region 44, 1928400-1929235 (835):

hypothetical protein	1928193	1929123	-
type IV secretion protein Rhs	1929131	1931894	-

Region 45, 1929797-1929927 (130):

type IV secretion protein Rhs	1929131	1931894	-

Region 46, 1932002-1932282 (280):
Region 47, 2064015-2066491 (2476):

DNA-binding protein	2064108	2064303	-
DNA-binding protein	2064549	2065485	-
hypothetical protein	2065706	2065955	+
hypothetical protein	2066072	2066399	+

Region 48, 2067694-2068122 (428):

hypothetical protein	2067673	2067946	-

Region 49, 2219836-2221901 (2065):
Region 50, 2222994-2227969 (4975):
Region 51, 2229404-2229679 (275):

transposase	2229643	2229916	+

Region 52, 2326340-2327375 (1035):
Region 53, 2332317-2332470 (153):

hypothetical protein	2331845	2333033	+

Region 54, 2526370-2547037 (20667):

hypothetical protein	2527369	2527642	-
replication protein	2527702	2528773	+
hypothetical protein	2528881	2529172	+
hypothetical protein	2529181	2529382	+
hypothetical protein	2529410	2529635	+
hypothetical protein	2531153	2531444	+
zonular occludens toxin	2531443	2532586	+
hypothetical protein	2532674	2532968	+
hypothetical protein	2534135	2534408	-
replication protein	2534468	2535539	+
hypothetical protein	2535647	2535938	+
hypothetical protein	2535947	2536148	+
hypothetical protein	2536176	2536401	+
hypothetical protein	2537919	2538210	+
zonular occludens toxin	2538209	2539352	+
hypothetical protein	2539440	2539734	+
hypothetical protein	2539902	2540286	-
replication protein	2541197	2542268	+
hypothetical protein	2542376	2542667	+
hypothetical protein	2542676	2542877	+
hypothetical protein	2542905	2543130	+
hypothetical protein	2544648	2544939	+
zonular occludens toxin	2544938	2546081	+
hypothetical protein	2546169	2546445	+

Region 55, 2583625-2583785 (160):
Region 56, 2587875-2589386 (1511):

hypothetical protein	2587839	2588046	-
hypothetical protein	2588394	2589225	-
ATPase AAA	2589288	2592012	-

Region 57, 2601444-2601574 (130):

type IV secretion protein Rhs	2599476	2602239	+

Region 58, 2602314-2604988 (2674):

hypothetical protein	2602180	2603086	+
hypothetical protein	2603105	2605973	+

Region 59, 2605679-2606332 (653):

hypothetical protein	2603105	2605973	+
hypothetical protein	2605984	2607010	+

Region 60, 2607016-2607319 (303):
Region 61, 2608032-2608684 (652):

hypothetical protein	2608317	2609340	+

Region 62, 2610901-2611521 (620):

hypothetical protein	2611199	2612219	+

Region 63, 2706334-2706454 (120):
Region 64, 2713347-2713468 (121):
Region 65, 2820275-2820526 (251):

hypothetical protein	2820223	2820496	-

Region 66, 2904495-2909688 (5193):

chemotaxis protein CheY	2906615	2906960	+
histidine kinase	2907067	2909923	-

Region 67, 2955697-2995119 (39422):

hypothetical protein	2955956	2956208	-
hypothetical protein	2956352	2957081	-
hypothetical protein	2957080	2957638	-
hypothetical protein	2957706	2958921	-
hypothetical protein	2959961	2962052	-
hypothetical protein	2967612	2967924	-
hypothetical protein	2967933	2968146	-
hypothetical protein	2968157	2969366	-
hypothetical protein	2969381	2970287	-
terminase	2972357	2973683	-
hypothetical protein	2974461	2974944	+
hypothetical protein	2974971	2975187	-
hypothetical protein	2975183	2975510	-
hypothetical protein	2975509	2975992	-
hypothetical protein	2976183	2976633	-
hypothetical protein	2976859	2977333	-
hypothetical protein	2977329	2977569	-
hypothetical protein	2977565	2977952	-
hypothetical protein	2977944	2978145	-
hypothetical protein	2978434	2978755	-
hypothetical protein	2978751	2979195	-
hypothetical protein	2979194	2979380	-
hypothetical protein	2980440	2980779	-
hypothetical protein	2981080	2981272	-
phosphoadenosine phosphosulfate reductase	2981442	2982390	-
hypothetical protein	2982389	2982686	-
hypothetical protein	2983803	2984091	-
hypothetical protein	2984308	2984494	-
hypothetical protein	2984699	2985215	+
hypothetical protein	2985222	2985429	-
repressor	2985500	2986178	+
hypothetical protein	2986221	2986512	+
hypothetical protein	2987003	2987486	-
hypothetical protein	2987497	2987698	-
hypothetical protein	2987862	2988198	+
hypothetical protein	2988284	2988650	+
hypothetical protein	2989187	2989403	+
hypothetical protein	2989399	2989609	+
hypothetical protein	2989605	2989815	+
hypothetical protein	2990277	2990475	+
hypothetical protein	2990512	2991472	+
DNA recombinase	2991480	2992395	+
recombinase	2992391	2993159	+
methyltransferase	2993298	2993814	+
hypothetical protein	2993800	2994121	+
hypothetical protein	2994195	2994753	-

Region 68, 3209229-3209355 (126):

transposase	3209197	3210148	+

Region 69, 3210155-3210300 (145):

integrase	3210294	3210552	-

Region 70, 3288944-3291362 (2418):

sulfatase modifying factor 1	3289085	3290048	+
hypothetical protein	3290100	3291339	-

Region 71, 3292569-3295343 (2774):

hypothetical protein	3292528	3293593	-
sulfatase modifying factor 1	3293651	3294611	+
hypothetical protein	3294663	3295281	-

Region 72, 3296860-3302853 (5993):

sulfatase modifying factor 1	3298526	3299492	+
DNA repair protein	3299544	3302610	-
type IV secretion protein Rhs	3302596	3305536	-

Region 73, 3306051-3313998 (7947):

sulfatase modifying factor 1	3306192	3307149	+
sulfatase modifying factor 1	3309540	3310500	+
sulfatase modifying factor 1	3312991	3313951	+

Region 74, 3315312-3316063 (751):

hypothetical protein	3315347	3316028	-

Region 75, 3317228-3319815 (2587):
Region 76, 3323762-3324154 (392):
Region 77, 3328346-3328598 (252):

hypothetical protein	3328558	3328846	-

Region 78, 3459440-3459552 (112):
Region 79, 3484876-3486407 (1531):

calcium-binding protein	3482701	3485596	+

Region 80, 3491608-3491762 (154):

hypothetical protein	3490786	3492220	+

Region 81, 3504568-3504722 (154):

hypothetical protein	3503746	3505180	+

Region 82, 3519524-3520952 (1428):

hypothetical protein	3519993	3520839	-
type VI secretion protein	3520865	3521249	-

Region 83, 3528382-3532849 (4467):

hypothetical protein	3528460	3529783	-
hypothetical protein	3530283	3530763	-
hypothetical protein	3530912	3531392	-
hypothetical protein	3531415	3531880	-
hypothetical protein	3531876	3532773	-

Region 84, 3534135-3536743 (2608):

hypothetical protein	3534200	3535772	-

Region 85, 3537921-3538765 (844):

type IV secretion protein Rhs	3538668	3541485	-

Region 86, 3627387-3627893 (506):

type I restriction-modification system subunit S	3625762	3628033	-

Region 87, 3640585-3641027 (442):

hypothetical protein	3640570	3641956	+

Region 88, 3641136-3641717 (581):

hypothetical protein	3640570	3641956	+

Region 89, 3643514-3644251 (737):

integrase	3643821	3644508	+

Region 90, 3646099-3646849 (750):

hypothetical protein	3646450	3646780	-

Region 91, 3717782-3718013 (231):
Region 92, 3834022-3834469 (447):

hypothetical protein	3834171	3834756	-

Region 93, 4024509-4025303 (794):
Region 94, 4090930-4091419 (489):

xylanase	4090938	4092159	-

Region 95, 4183522-4183653 (131):
Region 96, 4350461-4354728 (4267):

hypothetical protein	4350591	4351245	+
transposase	4351241	4353110	+
ATPase AAA	4353096	4354002	+

Region 97, 4355932-4360365 (4433):

DNA methyltransferase	4356243	4357089	-
hypothetical protein	4358563	4360288	-
lipoyl synthase	4360326	4361373	-

Region 98, 4367799-4368197 (398):

hypothetical protein	4367945	4368224	-

Region 99, 4369477-4369690 (213):

hypothetical protein	4369443	4369626	-
hypothetical protein	4369580	4370012	-

Region 100, 4370011-4371747 (1736):

hypothetical protein	4369580	4370012	-

Region 101, 4374316-4381838 (7522):

hypothetical protein	4374295	4374691	-
hypothetical protein	4376126	4377212	-
hypothetical protein	4378725	4379265	-
hypothetical protein	4379801	4381346	-
hypothetical protein	4381345	4382332	-

Region 102, 4685839-4686257 (418):
Region 103, 4688319-4688563 (244):
Region 104, 4739224-4739407 (183):
Region 105, 4807020-4807136 (116):
Region 106, 4808668-4809229 (561):
Region 107, 4812025-4812860 (835):

type IV secretion protein Rhs	4809365	4812128	+
hypothetical protein	4812136	4813063	+

Region 108, 4815392-4816596 (1204):

hypothetical protein	4813059	4815900	+

Region 109, 4818526-4819634 (1108):

hypothetical protein	4816681	4819024	+

Region 110, 4821678-4822946 (1268):

hypothetical protein	4819809	4822152	+
hypothetical protein	4822180	4822927	+

Region 111, 4825635-4827252 (1617):

hypothetical protein	4825466	4825934	-

Region 112, 4834417-4837541 (3124):
Region 113, 4838584-4838711 (127):
Region 114, 4839978-4840728 (750):

membrane protein	4838793	4840536	-

Region 115, 4911908-4912033 (125):
Region 116, 4947384-4949870 (2486):

endonuclease	4947411	4948284	-

Region 117, 4961836-4961936 (100):
Region 118, 4977437-4980513 (3076):

membrane protein	4977386	4978511	+
membrane protein	4978523	4979834	+
ABC transporter ATP-binding protein	4980251	4981046	+

Region 119, 5018134-5018279 (145):

exodeoxyribonuclease V subunit gamma	5018262	5021676	+

Region 120, 5036348-5036795 (447):

DNA-binding protein	5036520	5036769	-


References

Kurtz, S., Phillippy, A., Delcher, A. L., Smoot, M., Shumway, M., Antonescu, C. & Salzberg, S. L. (2004). Versatile and open software for comparing large genomes. Genome Biol 5.
Quinlan, A. R. & Hall, I. M. (2010). BEDTools: a flexible suite of utilities for comparing genomic features. Bioinformatics 26, 841-842.
