# Supplementary material
Source: publisher figshare collection journal article supplement (https://microbiology.figshare.com/articles/dataset/_/1545552)
Supplement: Supplementary file 1 [file 1 › File_S5_unique_regions_xoo.rtf]

Supplementary Material 
for

SMRT SEQUENCING OF XANTHOMONAS ORYZAE GENOMES REVEALS A DYNAMIC STRUCTURE AND COMPLEX TAL EFFECTOR GENE RELATIONSHIPS
Nicholas J. Booher1, Sara C. D. Carpenter1, Robert P. Sebra2, Li Wang1, Steven L. Salzberg3, Jan E. Leach4, and Adam J. Bogdanove1*
Address: 1 Plant Pathology and Plant-Microbe Biology Section, School of Integrative Plant Science, Cornell University, Ithaca, NY 14853 USA; 2 Icahn Institute for Genomics and Multiscale Biology and Department of Genetics & Genomic Sciences, Icahn School of Medicine at Mount Sinai, New York, NY 10029 USA; 3 Departments of Biomedical Engineering, Computer Science, and Biostatistics and Center for Computational Biology, Johns Hopkins University, Baltimore, MD 21205 USA; 4 Bioagricultural Sciences and Pest Management, Colorado State University, Ft. Collins, CO 80523 USA
*Corresponding author:  ajb7@cornell.edu


File S5. Genomic regions respectively unique in pairwise comparisons of PXO99A-s, PXO86, and MAFF311018. Regions unique to each genome were determined by aligning the other genomes to it with Nucmer 3.1 (Kurtz et al., 2004), using delta-filter (Kurtz et al., 2004) to filter to a many-to-many alignment allowing rearrangements, getting the complement of the aligned regions using bedtools 2.17 (Quinlan & Hall, 2010), and filtering the results to those 100 bp or longer. The coordinates and length of each unique region are given, followed by the product name, coordinates, and strand of any annotated protein coding sequences overlapping the region.

Regions unique to PXO99A-s when compared to PXO86:

Region 0, 227316-227451 (135):

conserved hypothetical protein	226961	228638	+

Region 1, 267878-268519 (641):
Region 2, 269595-270117 (522):
Region 3, 569037-570900 (1863):
Region 4, 917036-918080 (1044):

LysM domain protein	917231	918506	+

Region 5, 1327712-1328273 (561):

lipoprotein, putative	1327675	1328635	-

Region 6, 1352348-1353933 (1585):
Region 7, 1391907-1393466 (1559):

DNA (cytosine-5)-methyltransferase PliMCI	1392095	1393283	+

Region 8, 1394783-1396947 (2164):

conserved hypothetical protein	1394830	1395505	+
transposase TnpA, ISL3 family	1395497	1396916	+
ISXoo2 transposase	1396895	1397951	-

Region 9, 1403480-1404121 (641):

conserved hypothetical protein	1403274	1403832	+
carbon-nitrogen hydrolase family protein	1403949	1404834	+

Region 10, 1475897-1477482 (1585):
Region 11, 1479681-1480665 (984):

RhsD protein	1477497	1480251	+

Region 12, 1556219-1558079 (1860):

RHS Repeat family	1552766	1557506	+
hypothetical protein	1557642	1557897	+
RHS Repeat family	1558032	1559271	+

Region 13, 1567079-1567895 (816):

RhsD protein	1563622	1567909	+

Region 14, 1569058-1569984 (926):
Region 15, 1576004-1576235 (231):
Region 16, 1577861-1578011 (150):

conserved hypothetical protein	1577773	1577902	-

Region 17, 1582520-1583619 (1099):

conserved hypothetical protein	1582370	1582553	-
conserved hypothetical protein	1583129	1585964	-

Region 18, 1854995-1855643 (648):
Region 19, 1877742-1878873 (1131):

conserved hypothetical protein	1875771	1878114	+
conserved hypothetical protein	1878748	1878877	+

Region 20, 2027648-2027835 (187):
Region 21, 2348349-2350434 (2085):

RhsD protein	2349017	2351069	+

Region 22, 2352438-2352883 (445):

RhsD protein	2351065	2352907	+

Region 23, 2365037-2372949 (7912):

hypothetical protein	2365722	2365926	+
phage replication protein	2366220	2367135	+
helix-destabilizing protein	2367239	2367539	+
hypothetical protein	2367542	2367662	+
hypothetical protein	2367902	2368142	+
phage-related protein	2368917	2369733	+
phage-related protein	2370051	2371236	+

Region 24, 2374772-2374972 (200):
Region 25, 2659415-2659623 (208):
Region 26, 2661759-2662733 (974):

Rhs family protein	2662288	2665315	-

Region 27, 2666576-2666923 (347):
Region 28, 2668006-2668325 (319):

hypothetical protein	2667949	2668135	-

Region 29, 2696796-2697059 (263):
Region 30, 3053843-3054084 (241):

hypothetical protein	3053865	3053979	+

Region 31, 3054306-3054460 (154):
Region 32, 3059151-3059292 (141):
Region 33, 3169064-3169553 (489):

conserved hypothetical protein	3166718	3169553	+

Region 34, 3170378-3170999 (621):

conserved hypothetical protein	3170806	3171133	+

Region 35, 3178361-3178950 (589):

conserved hypothetical protein	3178944	3179652	+

Region 36, 3317329-3317762 (433):

conserved hypothetical protein	3317674	3318283	-

Region 37, 3318466-3319060 (594):

conserved hypothetical protein	3318308	3318608	-

Region 38, 3320223-3320721 (498):

conserved hypothetical protein	3320233	3323068	-

Region 39, 3324289-3325284 (995):
Region 40, 3325496-3327111 (1615):

conserved hypothetical protein	3325743	3327123	+

Region 41, 3328101-3337888 (9787):

DNA methylase	3327960	3328671	-
phage portal protein, pbsx family	3328859	3329885	-
phage terminase, ATPase subunit	3329881	3331483	-
phage capsid scaffolding protein (GPO)	3331787	3332630	+
phage major capsid protein, P2 family	3332676	3333693	+
phage-related terminase	3333696	3334416	+
phage head completion protein (GPL)	3334515	3334983	+
phage Tail Protein X	3334997	3335192	+
phage-related protein	3335196	3335553	+
phage-related protein	3335530	3335821	+
phage-related lytic enzyme	3335817	3336459	+
lipoprotein, putative	3336458	3336947	+
P2 phage tail completion protein R (GpR)	3336943	3337363	+
phage virion morphogenesis protein	3337350	3337797	+

Region 42, 3338118-3359718 (21600):

conserved hypothetical protein	3338288	3339458	+
phage-related baseplate assembly protein	3339588	3340479	+
phage tail protein I	3340507	3341017	+
phage-related protein	3341026	3342532	+
probable tail fiber assembly protein, putative	3342731	3343118	+
phage-related baseplate protein	3343178	3343742	+
phage-related baseplate protein	3343738	3344098	+
phage tail sheath protein	3344109	3345276	+
phage major tail tube protein	3345306	3345816	+
phage tail protein E	3345861	3346164	+
phage tail protein, P2 GpE family	3346172	3346286	+
phage-related tail protein	3346318	3349189	+
gpU	3349201	3349603	+
bacteriophage P2 gpD protein	3349599	3350586	+
phage-related protei	3351193	3351625	-
hypothetical protein	3351899	3352043	-
hypothetical protein	3352140	3352278	+
N-acetylglucosamine-6-phosphate deacetylase	3352371	3352569	+
conserved hypothetical protein	3352565	3352778	+
phage-related protein	3352867	3355471	+
hypothetical protein	3355794	3356013	+
conserved hypothetical protein	3356009	3356288	+
conserved hypothetical protein	3356310	3356550	+
conserved hypothetical protein	3356926	3357049	+
conserved hypothetical protein	3357062	3357224	+
conserved hypothetical protein	3357279	3357489	+
conserved hypothetical protein	3357485	3357710	+
site-specific recombinase, phage integrase family	3358612	3359641	+

Region 43, 3433621-3434406 (785):
Region 44, 3504104-3504205 (101):
Region 45, 3614904-3615928 (1024):

conserved hypothetical protein	3615059	3615938	-

Region 46, 3617000-3620076 (3076):

HsdS polypeptide, part of CfrA family	3616930	3617386	-
type I restriction enzyme EcoEI M protein	3618315	3619785	-
conserved hypothetical protein	3619789	3620512	-

Region 47, 3621276-3623681 (2405):

type I restriction enzyme EcoAI R protein	3621211	3623593	-
plasmid stabilization system	3623671	3623980	-

Region 48, 3630780-3631221 (441):

type I restriction-modification system, S subunit	3630739	3632245	+

Region 49, 3631329-3632006 (677):

type I restriction-modification system, S subunit	3630739	3632245	+

Region 50, 3635312-3635964 (652):

conserved hypothetical protein	3635669	3638168	-

Region 51, 3638829-3639466 (637):

conserved hypothetical protein	3638169	3638913	-
conserved hypothetical protein	3639209	3642071	-

Region 52, 3663727-3665273 (1546):

EF hand domain protein	3661564	3664459	+

Region 53, 3666659-3669552 (2893):

Rhs element Vgr protein	3665293	3666727	+
conserved hypothetical protein	3666730	3668986	+
Rhs element Vgr protein	3669547	3671311	+

Region 54, 3706973-3708016 (1043):

conserved hypothetical protein	3707228	3707369	+
conserved hypothetical protein, putative	3707596	3708313	-

Region 55, 4281001-4281680 (679):

bacterioferritin	4280992	4281553	+

Region 56, 4282628-4282764 (136):
Region 57, 4287089-4287529 (440):

conserved hypothetical protein	4286556	4287093	-

Region 58, 4560824-4560991 (167):
Region 59, 4576908-4577317 (409):
Region 60, 4578380-4580468 (2088):

filamentous haemagglutinin, N-terminal:Adhesin HecA 20-residue repeat x2	4578319	4580452	-

Region 61, 4581950-4592534 (10584):

hypothetical protein	4581885	4581999	+
radical SAM domain protein	4584952	4585303	+
hypothetical gene	4586742	4587081	+
putative secretion protein	4588131	4589409	+
ABC transporter, ATP-binding protein	4589405	4591409	+
TPR repeat	4591773	4592472	+

Region 62, 4593092-4594817 (1725):

integrase core domain protein	4592893	4593595	-
transposase IS3	4593703	4593997	+
putative transposase	4594041	4594854	+

Region 63, 4595672-4595915 (243):
Region 64, 4597233-4597426 (193):

filamentous haemagglutinin	4597299	4599873	-

Region 65, 4621018-4621313 (295):

phosphoribosylamine--glycine ligase	4621312	4622602	+

Region 66, 4997966-4998684 (718):
Region 67, 5002968-5004585 (1617):

transposase	5002306	5003038	-
prophage Lp2 protein 6	5003191	5004472	+
bleomycin resistance protein	5004572	5004953	-

Region 68, 5004773-5005139 (366):

bleomycin resistance protein	5004572	5004953	-
putative secreted protein	5004959	5005313	-

Regions unique to PXO99A-s when compared to MAFF311018:

Region 0, 31166-32267 (1101):
Region 1, 33130-34546 (1416):

transposase	34517	34727	-

Region 2, 34785-39092 (4307):

conserved hypothetical protein	34957	35620	-
LasA	35773	36568	-
hypothetical protein	36545	36662	-
conserved hypothetical protein	36723	37209	+
proline-betaine transporter	37567	38212	-
proline/betaine transporter	38212	38788	-

Region 3, 117837-119040 (1203):

Rhs family protein	117041	118055	+
ISXo8 transposase	118035	120438	+

Region 4, 137239-137705 (466):
Region 5, 138759-139126 (367):
Region 6, 139339-139702 (363):

conserved hypothetical protein	139332	139536	-
hypothetical protein	139599	139743	+

Region 7, 197057-197763 (706):

hypothetical protein	197681	197795	+

Region 8, 322663-323548 (885):

RecF/RecN/SMC N terminal domain protein	321507	324162	-

Region 9, 914303-914756 (453):

conserved hypothetical protein	913963	915043	+

Region 10, 1013381-1013601 (220):

conserved hypothetical protein	1013313	1013622	+

Region 11, 1180275-1180814 (539):

two-component system sensor protein	1180248	1180515	-
two-component system regulatory protein	1180677	1181292	-

Region 12, 1211325-1214784 (3459):

extracellular protease	1212054	1213419	+
hypothetical protein	1213531	1213648	+
extracellular protease	1213777	1215460	+

Region 13, 1327712-1328273 (561):

lipoprotein, putative	1327675	1328635	-

Region 14, 1330893-1331133 (240):

ATPase involved in DNA repair	1330360	1330927	+

Region 15, 1391907-1393468 (1561):

DNA (cytosine-5)-methyltransferase PliMCI	1392095	1393283	+

Region 16, 1394783-1396947 (2164):

conserved hypothetical protein	1394830	1395505	+
transposase TnpA, ISL3 family	1395497	1396916	+
ISXoo2 transposase	1396895	1397951	-

Region 17, 1502519-1503203 (684):

hypothetical protein	1502715	1502835	+

Region 18, 1556205-1558079 (1874):

RHS Repeat family	1552766	1557506	+
hypothetical protein	1557642	1557897	+
RHS Repeat family	1558032	1559271	+

Region 19, 1558996-1560054 (1058):

RHS Repeat family	1558032	1559271	+

Region 20, 1560273-1561255 (982):
Region 21, 1562561-1562873 (312):

transposase	1562601	1562886	+

Region 22, 1577728-1578925 (1197):

conserved hypothetical protein	1577773	1577902	-

Region 23, 1582544-1583619 (1075):

conserved hypothetical protein	1582370	1582553	-
conserved hypothetical protein	1583129	1585964	-

Region 24, 1854942-1855645 (703):
Region 25, 1875166-1875595 (429):
Region 26, 1886072-1886236 (164):
Region 27, 2081447-2081900 (453):
Region 28, 2282355-2283261 (906):

transposase	2281546	2282419	+
hypothetical protein	2282449	2282563	-
phosphinothricin N-acetyltransferase	2282619	2283132	+

Region 29, 2286267-2290625 (4358):

conserved hypothetical protein	2286235	2286640	-
ATPase, AAA family	2287360	2288338	+
peptidase S8 and S53, subtilisin, kexin, sedolisin	2288334	2290563	+

Region 30, 2293610-2305751 (12141):

cointegrate resolution protein T	2293643	2294663	-
conserved hypothetical protein	2294919	2296527	+
conserved hypothetical protein	2296673	2297741	+
transcriptional regulator, ArsR family	2297806	2298085	+
arsenate reductase	2298081	2298612	+
arsenate reductase	2298622	2299036	+
arsenical resistance protein ArsH	2299032	2299758	+
arsenical membrane pump	2299776	2301081	+
cointegrase	2301718	2302687	+
transposase	2302696	2305657	+

Region 31, 2374772-2380266 (5494):

hypothetical protein	2374987	2375713	+
hypothetical protein	2375675	2377568	+
hypothetical protein	2377695	2378598	+
hypothetical protein	2379713	2379845	-
transposase	2380252	2380465	+

Region 32, 2380483-2380652 (169):
Region 33, 2381637-2382030 (393):
Region 34, 2494219-2494462 (243):

TonB-dependent outer membrane receptor	2491543	2494522	-

Region 35, 2666576-2666930 (354):
Region 36, 2668006-2669087 (1081):

hypothetical protein	2667949	2668135	-
RHS Repeat family	2668626	2672664	-

Region 37, 2677253-2679598 (2345):

glutamate synthase domain 2	2673938	2677868	-

Region 38, 3051935-3052780 (845):

peptidase, S54 (rhomboid) family, putative	3051671	3052499	-

Region 39, 3053843-3054091 (248):

hypothetical protein	3053865	3053979	+

Region 40, 3054306-3054460 (154):
Region 41, 3054610-3055886 (1276):

hypothetical protein	3054726	3054840	-

Region 42, 3169064-3169549 (485):

conserved hypothetical protein	3166718	3169553	+

Region 43, 3170375-3170958 (583):

conserved hypothetical protein	3170806	3171133	+

Region 44, 3178359-3178950 (591):

conserved hypothetical protein	3178944	3179652	+

Region 45, 3317329-3317762 (433):

conserved hypothetical protein	3317674	3318283	-

Region 46, 3318480-3319058 (578):

conserved hypothetical protein	3318308	3318608	-

Region 47, 3320223-3320724 (501):

conserved hypothetical protein	3320233	3323068	-

Region 48, 3324284-3325284 (1000):
Region 49, 3325496-3327090 (1594):

conserved hypothetical protein	3325743	3327123	+

Region 50, 3350519-3353867 (3348):

bacteriophage P2 gpD protein	3349599	3350586	+
phage-related protei	3351193	3351625	-
hypothetical protein	3351899	3352043	-
hypothetical protein	3352140	3352278	+
N-acetylglucosamine-6-phosphate deacetylase	3352371	3352569	+
conserved hypothetical protein	3352565	3352778	+
phage-related protein	3352867	3355471	+

Region 51, 3356377-3359718 (3341):

conserved hypothetical protein	3356310	3356550	+
conserved hypothetical protein	3356926	3357049	+
conserved hypothetical protein	3357062	3357224	+
conserved hypothetical protein	3357279	3357489	+
conserved hypothetical protein	3357485	3357710	+
site-specific recombinase, phage integrase family	3358612	3359641	+

Region 52, 3614904-3615934 (1030):

conserved hypothetical protein	3615059	3615938	-

Region 53, 3616991-3620076 (3085):

HsdS polypeptide, part of CfrA family	3616930	3617386	-
type I restriction enzyme EcoEI M protein	3618315	3619785	-
conserved hypothetical protein	3619789	3620512	-

Region 54, 3621276-3623681 (2405):

type I restriction enzyme EcoAI R protein	3621211	3623593	-
plasmid stabilization system	3623671	3623980	-

Region 55, 3630770-3631221 (451):

type I restriction-modification system, S subunit	3630739	3632245	+

Region 56, 3631329-3632006 (677):

type I restriction-modification system, S subunit	3630739	3632245	+

Region 57, 3661463-3665273 (3810):

Rhs element Vgr protein	3658996	3661540	+
EF hand domain protein	3661564	3664459	+

Region 58, 3666653-3669552 (2899):

Rhs element Vgr protein	3665293	3666727	+
conserved hypothetical protein	3666730	3668986	+
Rhs element Vgr protein	3669547	3671311	+

Region 59, 3919101-3919267 (166):
Region 60, 4307055-4308244 (1189):
Region 61, 4547099-4547564 (465):

conserved hypothetical protein	4546919	4547114	-

Region 62, 4550264-4550829 (565):

methyltransferase	4550236	4550485	-
methyltransferase	4550496	4552311	-

Region 63, 4557966-4558391 (425):
Region 64, 4576694-4577322 (628):

Rhs family protein	4576675	4576870	-

Region 65, 4578379-4580468 (2089):

filamentous haemagglutinin, N-terminal:Adhesin HecA 20-residue repeat x2	4578319	4580452	-

Region 66, 4581951-4592534 (10583):

hypothetical protein	4581885	4581999	+
radical SAM domain protein	4584952	4585303	+
hypothetical gene	4586742	4587081	+
putative secretion protein	4588131	4589409	+
ABC transporter, ATP-binding protein	4589405	4591409	+
TPR repeat	4591773	4592472	+

Region 67, 4593092-4594817 (1725):

integrase core domain protein	4592893	4593595	-
transposase IS3	4593703	4593997	+
putative transposase	4594041	4594854	+

Region 68, 4595391-4595915 (524):

filamentous haemagglutinin	4595388	4595544	-

Region 69, 4597233-4612974 (15741):

filamentous haemagglutinin	4597299	4599873	-
hypothetical protein	4600150	4600282	+
filamentous haemagglutinin; haemagglutination activity domain protein	4600321	4610902	-
outer membrane hemolysin activator protein	4611067	4612780	-

Region 70, 4614614-4615451 (837):

ice nucleation protein	4614611	4615442	-

Region 71, 4621018-4621313 (295):

phosphoribosylamine--glycine ligase	4621312	4622602	+

Region 72, 4687577-4689034 (1457):

ribonucleoside-diphosphate reductase, beta subunit	4689014	4690058	-

Region 73, 5002968-5004585 (1617):

transposase	5002306	5003038	-
prophage Lp2 protein 6	5003191	5004472	+
bleomycin resistance protein	5004572	5004953	-

Region 74, 5004773-5005139 (366):

bleomycin resistance protein	5004572	5004953	-
putative secreted protein	5004959	5005313	-

Regions unique to PXO86 when compared to PXO99A-s:

Region 0, 265181-267451 (2270):

hypothetical protein	265815	266358	+
hypothetical protein	266354	267173	+

Region 1, 268507-269152 (645):

hypothetical protein	268678	268858	-

Region 2, 567681-570005 (2324):

deoxyguanosinetriphosphate triphosphohydrolase	567825	569259	+
hypothetical protein	569393	569975	+

Region 3, 571073-572386 (1313):

hypothetical protein	571075	571174	-
hypothetical protein	571225	571540	-
hypothetical protein	571532	571832	+
hypothetical protein	572218	572446	+

Region 4, 1097427-1098082 (655):

transposase	1097017	1098349	-

Region 5, 1247417-1247518 (101):
Region 6, 1252941-1256785 (3844):

type IV secretion protein Rhs	1250587	1253017	+
hypothetical protein	1253031	1253913	+
hypothetical protein	1253969	1254374	+
hypothetical protein	1254397	1254877	+
hypothetical protein	1255383	1256706	+

Region 7, 1273132-1274759 (1627):

hypothetical protein	1273154	1273718	-
calcium-binding protein	1273879	1276921	-

Region 8, 1281145-1284130 (2985):

hypothetical protein	1281147	1282227	-
hypothetical protein	1282223	1283762	-
type IV secretion protein Rhs	1283761	1285999	-

Region 9, 1286213-1288011 (1798):

type IV secretion protein Rhs	1287753	1289322	-

Region 10, 1309979-1310563 (584):

hypothetical protein	1307373	1310241	+
hypothetical protein	1310245	1311265	+

Region 11, 1313887-1314417 (530):

type I restriction endonuclease StySPI subunit S	1313647	1314529	-

Region 12, 1314525-1314963 (438):

type I restriction endonuclease StySPI subunit S	1313647	1314529	-

Region 13, 1321766-1330185 (8419):

plasmid stabilization protein	1321763	1322072	+
restriction endonuclease	1322124	1323117	+
DNA methyltransferase	1323134	1324949	+
hypothetical protein	1324962	1325394	+
restriction endonuclease subunit S	1325386	1326961	+
DEAD/DEAH box helicase	1326960	1330140	+

Region 14, 1360705-1361778 (1073):

outer protein P	1360817	1362950	+

Region 15, 1415102-1416080 (978):

hypothetical protein	1415221	1415527	+

Region 16, 1417141-1418753 (1612):
Region 17, 1729220-1729365 (145):
Region 18, 1732204-1733325 (1121):

hypothetical protein	1729856	1732691	+
hypothetical protein	1732712	1733465	+

Region 19, 1736424-1736665 (241):
Region 20, 1738182-1738372 (190):

hypothetical protein	1738213	1738387	+

Region 21, 1739464-1740138 (674):

hypothetical protein	1739519	1740266	+

Region 22, 2011776-2012669 (893):

ATPase domain protein	2011836	2012835	+

Region 23, 2015163-2015540 (377):

hypothetical protein	2015214	2015331	-

Region 24, 2015741-2016449 (708):

hypothetical protein	2015589	2016033	+
hypothetical protein	2016029	2016446	+
hypothetical protein	2016363	2017338	-

Region 25, 2036070-2036285 (215):
Region 26, 2626182-2627314 (1132):
Region 27, 2803830-2804914 (1084):

hypothetical protein	2804429	2807264	-

Region 28, 3138308-3138714 (406):

beta-galactosidase	3137641	3138634	+

Region 29, 3337002-3337193 (191):

type IV secretion protein Rhs	3335190	3337044	-

Region 30, 3339354-3339881 (527):
Region 31, 3341048-3341388 (340):

hypothetical protein	3341068	3341338	+

Region 32, 3347752-3347947 (195):

type IV secretion protein Rhs	3345485	3347798	-

Region 33, 3349011-3349999 (988):

type IV secretion protein Rhs	3348985	3353455	-

Region 34, 3554866-3557352 (2486):

hypothetical protein	3554946	3557055	-

Region 35, 3558518-3561652 (3134):

hypothetical protein	3559216	3559849	-
hypothetical protein	3560213	3560405	+
hypothetical protein	3560757	3561546	-

Region 36, 3563987-3565560 (1573):
Region 37, 3989625-3989798 (173):

hypothetical protein	3988755	3990450	-

Region 38, 4506667-4516964 (10297):

endonuclease	4506811	4507609	-
DNA-methyltransferase	4507605	4508880	-
XorII very short patch repair endonuclease	4508960	4509371	-
hypothetical protein	4509363	4510035	-
hypothetical protein	4510683	4510842	-
hypothetical protein	4510838	4511141	-
conjugal transfer protein TraH	4511147	4512233	-
conjugal transfer protein TraG	4512234	4512495	-
hypothetical protein	4512491	4512971	-
type IV secretion protein VirB5	4512984	4513704	-
hypothetical protein	4514054	4514300	-
hypothetical protein	4514335	4515175	-
integrase	4515643	4516738	-

Region 39, 4575804-4575975 (171):
Region 40, 4577047-4577397 (350):

hemagglutinin	4576441	4579057	-

Region 41, 4600186-4602106 (1920):

ATPase	4600235	4601471	+
hypothetical protein	4601470	4602085	+
phosphoribosylamine--glycine ligase	4602105	4603395	+

Region 42, 4990249-4990973 (724):

hypothetical protein	4990006	4990759	-
hypothetical protein	4990755	4991463	-

Regions unique to PXO86 when compared to MAFF311018:

Region 0, 31168-32269 (1101):

hypothetical protein	30988	32188	-

Region 1, 33132-34548 (1416):

hypothetical protein	33100	33982	-
hypothetical protein	34162	34357	-
transposase IS1479	34519	34723	-

Region 2, 34787-39094 (4307):

hypothetical protein	34959	35595	-
peptidase	35775	36594	-
ATPase	36737	37211	+
hypothetical protein	37431	37521	+

Region 3, 121459-122662 (1203):

type IV secretion protein Rhs	120663	121677	+
DDE endonuclease	121714	123691	+

Region 4, 140860-142048 (1188):

hypothetical protein	141943	142087	+

Region 5, 200051-200759 (708):

hypothetical protein	200104	200215	+
hypothetical protein	200678	200792	+

Region 6, 265180-267441 (2261):

hypothetical protein	265814	266357	+
hypothetical protein	266353	267172	+

Region 7, 268510-269153 (643):

hypothetical protein	268677	268857	-

Region 8, 321686-322048 (362):
Region 9, 323364-323891 (527):
Region 10, 567680-569996 (2316):

deoxyguanosinetriphosphate triphosphohydrolase	567824	569258	+
hypothetical protein	569392	569974	+

Region 11, 571072-572385 (1313):

hypothetical protein	571074	571173	-
hypothetical protein	571224	571539	-
hypothetical protein	571531	571831	+
hypothetical protein	572217	572445	+

Region 12, 831930-832042 (112):

hypothetical protein	831568	832648	+

Region 13, 834423-834876 (453):

hypothetical protein	834083	835163	+

Region 14, 934253-934473 (220):

hypothetical protein	933939	934494	+

Region 15, 1097420-1098629 (1209):

transposase	1097016	1098348	-
LuxR family transcriptional regulator	1098492	1099200	-

Region 16, 1130513-1133972 (3459):

peptidase S8	1131242	1132607	+
peptidase S8	1132950	1134648	+

Region 17, 1247415-1247516 (101):
Region 18, 1249119-1249319 (200):

DNA repair ATPase	1248586	1249153	+
sulfatase modifying factor 1	1249209	1250166	-

Region 19, 1265512-1265655 (143):

hypothetical protein	1265066	1265681	+

Region 20, 1273130-1277021 (3891):

hypothetical protein	1273152	1273716	-
calcium-binding protein	1273877	1276919	-
type IV secretion protein Rhs	1276943	1279481	-

Region 21, 1281143-1284124 (2981):

hypothetical protein	1281145	1282225	-
hypothetical protein	1282221	1283760	-
type IV secretion protein Rhs	1283759	1285997	-

Region 22, 1313885-1314412 (527):

type I restriction endonuclease StySPI subunit S	1313645	1314527	-

Region 23, 1314527-1314959 (432):
Region 24, 1325690-1326200 (510):

restriction endonuclease subunit S	1325384	1326959	+

Region 25, 1326350-1326959 (609):

restriction endonuclease subunit S	1325384	1326959	+
DEAD/DEAH box helicase	1326958	1330138	+

Region 26, 1360703-1361776 (1073):

outer protein P	1360815	1362948	+

Region 27, 1415100-1416078 (978):

hypothetical protein	1415219	1415525	+

Region 28, 1417140-1418751 (1611):
Region 29, 2011719-2012678 (959):

ATPase domain protein	2011835	2012834	+

Region 30, 2015161-2015396 (235):

hypothetical protein	2015213	2015330	-

Region 31, 2032436-2032846 (410):

hypothetical protein	2032289	2033024	+

Region 32, 2036076-2036289 (213):
Region 33, 2038932-2039096 (164):

hypothetical protein	2038899	2039199	+

Region 34, 2236339-2236792 (453):

methylamine utilization protein	2236335	2236497	-

Region 35, 2238405-2240280 (1875):

hypothetical protein	2238529	2238727	+
hypothetical protein	2239982	2244059	+

Region 36, 2248885-2249671 (786):

type IV secretion protein Rhs	2244088	2249371	+

Region 37, 2415873-2416116 (243):

membrane protein	2415812	2418791	+

Region 38, 2525577-2525963 (386):
Region 39, 2526946-2527118 (172):
Region 40, 2527334-2532625 (5291):

transposase	2527134	2527338	-
hypothetical protein	2527760	2527886	+
hypothetical protein	2528003	2528162	+
hypothetical protein	2529001	2529754	-
hypothetical protein	2530031	2531924	-
hypothetical protein	2531886	2532612	-

Region 41, 2597125-2609266 (12141):

transposase IS630	2596897	2597161	-
transposase Tn5044	2597218	2600179	-
integrase	2600188	2601157	-
sulfurtransferase	2601174	2601705	-
arylsulfatase	2601794	2603099	-
NADPH-dependent FMN reductase	2603117	2603843	-
arsenate reductase	2603839	2604253	-
ArsR family transcriptional regulator	2604263	2604794	-
ArsR family transcriptional regulator	2604790	2605138	-
conjugal transfer protein	2606348	2607929	-
transposase	2608212	2609232	+

Region 42, 2612246-2616610 (4364):

peptidase S8 and S53, subtilisin, kexin, sedolisin	2612304	2614533	-
ATPase	2614529	2615693	-
hypothetical protein	2616227	2616632	+

Region 43, 2619608-2620513 (905):

phosphinothricin acetyltransferase	2619735	2620254	-
DDE endonuclease	2620448	2621321	-

Region 44, 2799604-2799727 (123):
Region 45, 2800786-2801794 (1008):

hypothetical protein	2800723	2801281	-
hypothetical protein	2801303	2803646	-

Region 46, 3215654-3216695 (1041):
Region 47, 3217752-3218971 (1219):
Region 48, 3337002-3337187 (185):

type IV secretion protein Rhs	3335190	3337044	-

Region 49, 3339351-3339881 (530):
Region 50, 3341057-3341386 (329):

hypothetical protein	3341068	3341338	+

Region 51, 3347756-3347941 (185):

type IV secretion protein Rhs	3345485	3347798	-

Region 52, 3349004-3349999 (995):

type IV secretion protein Rhs	3348985	3353455	-

Region 53, 3354205-3354517 (312):

transposase	3354191	3354587	-

Region 54, 3355823-3357861 (2038):

hypothetical protein	3356043	3356619	-
type IV secretion protein Rhs	3356622	3361317	-

Region 55, 3410884-3411571 (687):

hypothetical protein	3410958	3411453	-

Region 56, 3812567-3812733 (166):
Region 57, 4202141-4203330 (1189):
Region 58, 4443966-4444431 (465):

hypothetical protein	4443780	4443975	-

Region 59, 4447983-4448548 (565):
Region 60, 4455686-4456108 (422):

hypothetical protein	4455601	4455931	+

Region 61, 4506674-4516971 (10297):

endonuclease	4506812	4507610	-
DNA-methyltransferase	4507606	4508881	-
XorII very short patch repair endonuclease	4508961	4509372	-
hypothetical protein	4509364	4510036	-
hypothetical protein	4510684	4510843	-
hypothetical protein	4510839	4511142	-
conjugal transfer protein TraH	4511148	4512234	-
conjugal transfer protein TraG	4512235	4512496	-
hypothetical protein	4512492	4512972	-
type IV secretion protein VirB5	4512985	4513705	-
hypothetical protein	4514055	4514301	-
hypothetical protein	4514336	4515176	-
integrase	4515644	4516739	-

Region 62, 4573037-4573245 (208):

hypothetical protein	4573012	4573207	-

Region 63, 4575811-4575989 (178):
Region 64, 4577053-4592164 (15111):

hemagglutinin	4576442	4579058	-
hypothetical protein	4579146	4579239	-
hemagglutinin	4579506	4590231	-
membrane protein	4590252	4591995	-

Region 65, 4593792-4594628 (836):

ice nucleation protein	4593780	4594611	-

Region 66, 4668394-4669851 (1457):

hypothetical protein	4668593	4669085	-
hypothetical protein	4669084	4669783	-
ribonucleotide-diphosphate reductase subunit beta	4669825	4670869	-

Regions unique to MAFF311018 when compared to PXO99A-s:

Region 0, 113109-113251 (142):
Region 1, 216039-216281 (242):

conserved hypothetical protein	215452	217144	+

Region 2, 483227-484150 (923):

ribonucleoside-diphosphate reductase beta chain	482202	483246	+
hypothetical protein	483296	484136	+
conserved hypothetical protein	484149	484644	+

Region 3, 550442-552362 (1920):

conserved hypothetical protein	550462	551077	-
conserved hypothetical protein	551076	552312	-
bifunctional purine biosynthesis protein	552361	553945	-

Region 4, 580555-580655 (100):

conserved hypothetical protein	580337	580814	-

Region 5, 634590-635574 (984):

conserved hypothetical protein	634633	634798	+
putative Zn-dependent alcohol dehydrogenase	634882	635569	-

Region 6, 882009-882395 (386):

hypothetical protein	882181	882655	+

Region 7, 1072335-1073012 (677):

conserved hypothetical protein	1072350	1072989	-

Region 8, 1074184-1074931 (747):

conserved hypothetical protein	1074161	1074581	-
hypothetical protein	1074577	1074793	-

Region 9, 1076417-1076729 (312):

hypothetical protein	1076372	1076708	-

Region 10, 1461096-1461982 (886):

hypothetical protein	1460468	1461119	+
hypothetical protein	1461045	1461996	+

Region 11, 1463154-1463829 (675):

hypothetical protein	1463189	1463681	+
VGR-related protein	1463690	1466114	+

Region 12, 1466164-1468656 (2492):

conserved hypothetical protein	1466110	1467058	+
hypothetical protein	1467050	1467401	+
conserved hypothetical protein	1468153	1468600	+

Region 13, 1469488-1472607 (3119):

conserved hypothetical protein	1469696	1470368	+
conserved hypothetical protein	1470417	1472526	+
VGR-related protein	1472547	1474449	+

Region 14, 1595555-1596238 (683):

putative Rhs-related protein	1596199	1597708	+

Region 15, 1618823-1619807 (984):

conserved hypothetical protein	1619086	1619383	+

Region 16, 1711773-1716531 (4758):

hypothetical protein	1712100	1712505	+
conserved hypothetical protein	1712510	1712660	+
pseudouridylate synthase	1712949	1713660	-
conserved hypothetical protein	1713894	1714101	+
conserved hypothetical protein	1714304	1714733	+
conserved hypothetical protein	1714736	1715297	+
membrane transport protein	1715894	1716467	-

Region 17, 1723728-1726904 (3176):

phage-related integrase	1723803	1724988	-
conserved hypothetical protein	1724987	1725248	-
conserved hypothetical protein	1725205	1725412	-
conserved hypothetical protein	1725408	1725681	-
conserved hypothetical protein	1725919	1726195	-
conserved hypothetical protein	1726187	1726343	-
conserved hypothetical protein	1726356	1726767	-

Region 18, 1729399-1732816 (3417):

phage-related protein	1727794	1730491	-
conserved hypothetical protein	1730500	1730713	-
hypothetical protein	1730709	1730988	-
conserved hypothetical protein	1730998	1731319	-
phage-related protein	1731650	1732088	+
phage-related tail protein	1732748	1733735	-

Region 19, 1758441-1761268 (2827):

polymerase V subunit	1759263	1760550	-
conserved hypothetical protein	1760777	1761113	+

Region 20, 1836091-1838660 (2569):

conserved hypothetical protein	1836656	1837775	+
conserved hypothetical protein	1837771	1838443	+

Region 21, 1838874-1838995 (121):
Region 22, 1915133-1915539 (406):

conserved hypothetical protein	1915212	1916019	-

Region 23, 1970105-1970736 (631):

conserved hypothetical protein	1970101	1970752	-

Region 24, 2170655-2171004 (349):

conserved hypothetical protein	2170618	2170966	+

Region 25, 2370527-2376274 (5747):

TrbP protein	2370590	2371238	-
phage-related protein	2371239	2372427	-
conserved hypothetical protein	2372426	2372756	-
phage-related protein	2372755	2374204	-
phage-related protein	2374298	2374529	-
V protein	2374747	2375044	-
replication initiation protein	2375040	2376081	-
hypothetical protein	2376233	2376446	-

Region 26, 2376634-2377152 (518):

18.2K protein	2376716	2377388	+

Region 27, 2378982-2381000 (2018):

hypothetical protein	2379596	2379788	+
hypothetical protein	2380020	2380488	+
hypothetical protein	2380401	2380914	-

Region 28, 2381823-2382347 (524):
Region 29, 2448753-2449886 (1133):

hypothetical protein	2448780	2449662	-
hypothetical protein	2449786	2449954	+

Region 30, 2984365-2985455 (1090):

conserved hypothetical protein	2984964	2987307	-

Region 31, 2987503-2988593 (1090):

hypothetical protein	2987331	2988084	-
conserved hypothetical protein	2988105	2990448	-

Region 32, 2991166-2991733 (567):

hypothetical protein	2990472	2991207	-
conserved hypothetical protein	2991235	2994070	-

Region 33, 3007524-3008234 (710):

hypothetical protein	3006633	3007608	+
conserved hypothetical protein	3007525	3007942	-
conserved hypothetical protein	3007938	3008190	-

Region 34, 3008435-3010021 (1586):

conserved hypothetical protein	3008627	3009263	+

Region 35, 3011185-3012531 (1346):

hypothetical protein	3011169	3011778	-
hypothetical protein	3011774	3012089	-

Region 36, 3293898-3294967 (1069):

hypothetical protein	3293721	3294459	-
conserved hypothetical protein	3294489	3296832	-

Region 37, 3297009-3298127 (1118):

conserved hypothetical protein	3297624	3300678	-

Region 38, 3300951-3301096 (145):
Region 39, 3695000-3700214 (5214):

type I restriction-modification system endonuclease	3695044	3698224	-
hypothetical protein	3698223	3698898	-
conserved hypothetical protein	3698897	3699644	-
hypothetical protein	3699640	3700174	-

Region 40, 3701386-3701611 (225):
Region 41, 3702777-3707093 (4316):

conserved hypothetical protein	3702758	3703472	-
nucleotidyltransferase	3703464	3703899	-
type I restriction system adenine methylase	3703909	3705724	-
conserved hypothetical protein	3705741	3706734	-
conserved hypothetical protein	3706786	3707095	-

Region 42, 3713885-3714315 (430):

specificity determinant for hsdM and hsdR	3713869	3715222	+

Region 43, 3714423-3714983 (560):

specificity determinant for hsdM and hsdR	3713869	3715222	+

Region 44, 3718295-3718817 (522):

hypothetical protein	3717605	3718442	-

Region 45, 3725781-3726365 (584):

conserved hypothetical protein	3725078	3726098	-
hypothetical protein	3726102	3728046	-

Region 46, 3731623-3732251 (628):

conserved hypothetical protein	3730944	3731970	-
conserved hypothetical protein	3731973	3734841	-

Region 47, 3754206-3756004 (1798):

putative VGR-related protein	3751745	3754463	+
putative VGR-related protein	3755995	3757966	+

Region 48, 3769483-3774632 (5149):

conserved hypothetical protein	3769561	3770884	-
conserved hypothetical protein	3771390	3771870	-
conserved hypothetical protein	3771893	3772358	-
conserved hypothetical protein	3772674	3773154	-
conserved hypothetical protein	3773177	3773642	-
conserved hypothetical protein	3773638	3774535	-
putative VGR-related protein	3774534	3777351	-

Region 49, 4214633-4217872 (3239):

restriction endonuclease homolog R.XphI	4214731	4215826	-
methyltransferase homolog M.XphI	4215822	4217613	-

Region 50, 4231764-4232217 (453):

hypothetical protein	4231476	4232556	-

Region 51, 4903040-4903304 (264):

conserved hypothetical protein	4902738	4903095	+

Region 52, 4913841-4914565 (724):

hypothetical protein	4914347	4915055	-

Regions unique to MAFF311018 when compared to PXO86:

Region 0, 113108-113251 (143):
Region 1, 483227-484150 (923):

ribonucleoside-diphosphate reductase beta chain	482202	483246	+
hypothetical protein	483296	484136	+
conserved hypothetical protein	484149	484644	+

Region 2, 572565-572728 (163):
Region 3, 580555-580655 (100):

conserved hypothetical protein	580337	580814	-

Region 4, 634590-635574 (984):

conserved hypothetical protein	634633	634798	+
putative Zn-dependent alcohol dehydrogenase	634882	635569	-

Region 5, 882009-882395 (386):

hypothetical protein	882181	882655	+

Region 6, 903209-903655 (446):

hypothetical protein	903650	904187	+

Region 7, 905812-905944 (132):

ISXoo15 transposase	905921	906884	+

Region 8, 906892-907570 (678):

bacterioferritin	907017	907578	-

Region 9, 1072335-1073012 (677):

conserved hypothetical protein	1072350	1072989	-

Region 10, 1074181-1074933 (752):

conserved hypothetical protein	1074161	1074581	-
hypothetical protein	1074577	1074793	-

Region 11, 1076416-1076729 (313):

hypothetical protein	1076372	1076708	-

Region 12, 1427414-1428457 (1043):

conserved hypothetical protein	1427176	1427833	+
hypothetical protein	1427885	1428440	-
DNA-3-methyladenine glycosylase I	1428456	1429029	-

Region 13, 1517127-1517763 (636):

conserved hypothetical protein	1516891	1517479	+

Region 14, 1589553-1591138 (1585):

putative Rhs-related protein	1589425	1593916	+

Region 15, 1595557-1596238 (681):

putative Rhs-related protein	1596199	1597708	+

Region 16, 1597138-1598122 (984):

putative Rhs-related protein	1596199	1597708	+
hypothetical protein	1597713	1598082	+

Region 17, 1618823-1619807 (984):

conserved hypothetical protein	1619086	1619383	+

Region 18, 1673679-1675424 (1745):

conserved hypothetical protein	1670222	1674806	+

Region 19, 1711773-1716533 (4760):

hypothetical protein	1712100	1712505	+
conserved hypothetical protein	1712510	1712660	+
pseudouridylate synthase	1712949	1713660	-
conserved hypothetical protein	1713894	1714101	+
conserved hypothetical protein	1714304	1714733	+
conserved hypothetical protein	1714736	1715297	+
membrane transport protein	1715894	1716467	-

Region 20, 1723728-1745221 (21493):

phage-related integrase	1723803	1724988	-
conserved hypothetical protein	1724987	1725248	-
conserved hypothetical protein	1725205	1725412	-
conserved hypothetical protein	1725408	1725681	-
conserved hypothetical protein	1725919	1726195	-
conserved hypothetical protein	1726187	1726343	-
conserved hypothetical protein	1726356	1726767	-
conserved hypothetical protein	1726992	1727271	-
hypothetical protein	1727267	1727486	-
phage-related protein	1727794	1730491	-
conserved hypothetical protein	1730500	1730713	-
hypothetical protein	1730709	1730988	-
conserved hypothetical protein	1730998	1731319	-
phage-related protein	1731650	1732088	+
phage-related tail protein	1732748	1733735	-
phage-related tail protein	1733731	1734133	-
phage-related tail protein	1734145	1737016	-
phage-related protein	1737048	1737162	-
phage-related tail protein	1737170	1737473	-
phage-related tail protein	1737518	1738028	-
phage-related tail protein	1738058	1739225	-
phage-related baseplate protein	1739236	1739596	-
phage-related baseplate protein	1739592	1740156	-
hypothetical protein	1740216	1740795	-
hypothetical protein	1740802	1742308	-
phage-related tail protein	1742317	1742863	-
phage-related baseplate assembly protein	1742855	1743746	-
conserved hypothetical protein	1743876	1745046	-

Region 21, 1745447-1755228 (9781):

phage-related tail protein	1745537	1745984	-
phage-related tail protein	1745971	1746391	-
conserved hypothetical protein	1746387	1746876	-
phage-related lytic enzyme	1746875	1747514	-
phage-related protein	1747513	1747789	-
phage-related protein	1747781	1748138	-
phage-related tail protein	1748142	1748352	-
phage-related capsid completion protein	1748351	1748819	-
phage-related terminase	1748918	1749638	-
phage-related major capsid protein	1749641	1750658	-
phage-related capsid scaffold protein	1750704	1751547	-
phage-related terminase	1751668	1753453	+
phage-related capsid packaging protein	1753452	1754475	+
site-specific DNA-methyltransferase	1754663	1755365	+

Region 22, 1755674-1756392 (718):

conserved hypothetical protein	1755431	1756178	-
conserved hypothetical protein	1756174	1756882	-

Region 23, 1758441-1761268 (2827):

polymerase V subunit	1759263	1760550	-
conserved hypothetical protein	1760777	1761113	+

Region 24, 1832676-1832817 (141):

hypothetical protein	1832552	1832855	+

Region 25, 1836091-1838655 (2564):

conserved hypothetical protein	1836656	1837775	+
conserved hypothetical protein	1837771	1838443	+

Region 26, 1838880-1839224 (344):

ISXoo13 transposase	1839214	1840474	-

Region 27, 1970105-1970736 (631):

conserved hypothetical protein	1970101	1970752	-

Region 28, 2170655-2171004 (349):

conserved hypothetical protein	2170618	2170966	+

Region 29, 2195178-2195444 (266):
Region 30, 2362043-2369955 (7912):

phage-related protein	2361980	2362403	-
phage-related protein	2363067	2364141	+
phage-related protein	2364245	2364545	+
hypothetical protein	2364908	2365148	+
phage-related protein	2365284	2366739	+
phage-related protein	2367057	2368242	+
hypothetical protein	2368530	2368932	+
hypothetical protein	2368871	2369186	-

Region 31, 2370311-2377137 (6826):

hypothetical protein	2370035	2370419	+
TrbP protein	2370590	2371238	-
phage-related protein	2371239	2372427	-
conserved hypothetical protein	2372426	2372756	-
phage-related protein	2372755	2374204	-
phage-related protein	2374298	2374529	-
V protein	2374747	2375044	-
replication initiation protein	2375040	2376081	-
hypothetical protein	2376233	2376446	-
hypothetical protein	2376445	2376631	-
18.2K protein	2376716	2377388	+

Region 32, 2378982-2380996 (2014):

hypothetical protein	2379596	2379788	+
hypothetical protein	2380020	2380488	+
hypothetical protein	2380401	2380914	-

Region 33, 2381824-2382347 (523):
Region 34, 2394766-2394962 (196):
Region 35, 2396023-2396206 (183):
Region 36, 2400506-2402581 (2075):

RhsD protein	2398397	2402498	-

Region 37, 2765236-2765444 (208):
Region 38, 2768734-2769712 (978):

conserved hypothetical protein	2769267	2774103	-

Region 39, 2835395-2835589 (194):
Region 40, 2981257-2982213 (956):

conserved hypothetical protein	2981840	2984183	-

Region 41, 2990614-2990815 (201):

hypothetical protein	2990472	2991207	-

Region 42, 2991164-2991734 (570):

hypothetical protein	2990472	2991207	-
conserved hypothetical protein	2991235	2994070	-

Region 43, 3008578-3010019 (1441):

conserved hypothetical protein	3008627	3009263	+

Region 44, 3011186-3012542 (1356):

hypothetical protein	3011169	3011778	-
hypothetical protein	3011774	3012089	-

Region 45, 3293881-3294967 (1086):

hypothetical protein	3293721	3294459	-
conserved hypothetical protein	3294489	3296832	-

Region 46, 3510363-3511154 (791):

conserved hypothetical protein	3510415	3511591	-

Region 47, 3579083-3579189 (106):
Region 48, 3698224-3700207 (1983):

hypothetical protein	3698223	3698898	-
conserved hypothetical protein	3698897	3699644	-
hypothetical protein	3699640	3700174	-

Region 49, 3702777-3703167 (390):

conserved hypothetical protein	3702758	3703472	-

Region 50, 3713898-3714311 (413):

specificity determinant for hsdM and hsdR	3713869	3715222	+

Region 51, 3714426-3714983 (557):

specificity determinant for hsdM and hsdR	3713869	3715222	+

Region 52, 3718304-3718815 (511):

hypothetical protein	3717605	3718442	-

Region 53, 3719882-3719985 (103):

hypothetical protein	3719839	3722278	-

Region 54, 3722849-3723486 (637):

conserved hypothetical protein	3722189	3723221	-
hypothetical protein	3723229	3725167	-

Region 55, 3728632-3729284 (652):

conserved hypothetical protein	3727957	3728980	-
hypothetical protein	3728989	3730960	-

Region 56, 3731631-3732269 (638):

conserved hypothetical protein	3730944	3731970	-
conserved hypothetical protein	3731973	3734841	-

Region 57, 4214633-4217872 (3239):

restriction endonuclease homolog R.XphI	4214731	4215826	-
methyltransferase homolog M.XphI	4215822	4217613	-

Region 58, 4227360-4228411 (1051):

conserved hypothetical protein	4226933	4228208	-

Region 59, 4232084-4232195 (111):

hypothetical protein	4231476	4232556	-

Region 60, 4517548-4519406 (1858):

conserved hypothetical protein	4517580	4518315	-
conserved hypothetical protein	4518311	4519205	-

Region 61, 4815304-4816015 (711):

putative type III effector HopPtoH like protein	4815531	4815999	-

Region 62, 4817185-4817632 (447):
Region 63, 4903040-4903304 (264):

conserved hypothetical protein	4902738	4903095	+


References

Kurtz, S., Phillippy, A., Delcher, A. L., Smoot, M., Shumway, M., Antonescu, C. & Salzberg, S. L. (2004). Versatile and open software for comparing large genomes. Genome Biol 5.
Quinlan, A. R. & Hall, I. M. (2010). BEDTools: a flexible suite of utilities for comparing genomic features. Bioinformatics 26, 841-842.
