# Supplementary material
Source: publisher figshare collection journal article supplement (https://microbiology.figshare.com/articles/dataset/_/1545552)
Supplement: Supplementary file 1 [file 1 › File_S6_5_dup_alignment.rtf]

Supplementary Material 
for

SMRT SEQUENCING OF XANTHOMONAS ORYZAE GENOMES REVEALS A DYNAMIC STRUCTURE AND COMPLEX TAL EFFECTOR GENE RELATIONSHIPS
Nicholas J. Booher1, Sara C. D. Carpenter1, Robert P. Sebra2, Li Wang1, Steven L. Salzberg3, Jan E. Leach4, and Adam J. Bogdanove1*
Address: 1 Plant Pathology and Plant-Microbe Biology Section, School of Integrative Plant Science, Cornell University, Ithaca, NY 14853 USA; 2 Icahn Institute for Genomics and Multiscale Biology and Department of Genetics & Genomic Sciences, Icahn School of Medicine at Mount Sinai, New York, NY 10029 USA; 3 Departments of Biomedical Engineering, Computer Science, and Biostatistics and Center for Computational Biology, Johns Hopkins University, Baltimore, MD 21205 USA; 4 Bioagricultural Sciences and Pest Management, Colorado State University, Ft. Collins, CO 80523 USA
*Corresponding author:  ajb7@cornell.edu


File S6. Alignment of tal gene 5' ends that have five codon deviations. Sequences of the 5' ends of the archetypal X. euvesicatoria avrBs3 gene, the BLS256 tal2g gene (representing Xoc tal genes), and avrXa27 (representing Xoo tal genes) are shown for comparison. The sequence duplicated in CFBP7342 tal8 is highlighted in aqua, and the second copy is highlighted in magenta. These sequences are preceded by a variant (yellow) that is present also in the representative tal genes including avrXa27, but absent from the other three Xoo tal genes. Genbank accessions for sequences included in the alignment are X16130.1 for avrBs3, CP003057.1 for BLS256, CP000967.1 for PXO99A, CP007166.1 for PXO86, CP007221.1 for CFBP7342, and AP008229.1 for MAFF311018.

avrBs3                ATGGATCCCATTCGTTCGCGCACACCAAGTCCTGCCCGCGAGCTTCTGCCCGGACCCCAA 60
bls256_tal2g          ATGGATCCCATTCGTCCGCGCAGGCCAAGTCCTGCCCGCGAGCCTCTGCCCGGACCCCAA 60
avrXa27               ATGGATCCCATTCGTTCGCGCACGCCAAGTCCTGCCCGCGAGCTTCTGCCCGGACCCCAA 60
pxo99a_5a             ATGGATCCCATTCGTTCGCGTACGCCAAGTCCTGCCCGCGAGCTTCTGCCCGGACCCCAA 60
pxo86_tal5a           ATGGATCCCATTCGTTCGCGTACGCCAAGTCCTGCCCGCGAGCTTCTGCCCGGACCCCAA 60
maff311018_tal3a      ATGGATCCCATTCGTTCGCGTACGCCAAGTCCTGCCCGCGAGCTTCTGCCCGGACCCCAA 60
cfbp7342_tal8         ATGGATCCCATTCGTCCGCGCAGGCCAAGTCCTGCCCGCGAGCTTCTGCCCGGACCCCAA 60
                      *************** **** *  ******************* ****************

avrBs3                CCCGATGGGGTTCAGCCGACTGCAGATCGTGGGGTGTCTCCGCCTGCCGGCGGCCCCCTG 120
bls256_tal2g          CCGGATGGGGTTCAGCCGACTGCAGATCGGGGGGTGTCTGCGCCTGCTGGCGGCCCTCTG 120
avrXa27               CCGGATAGGGTTCAGCCGACTGCAGATCGGGGGGGGGCTCCGCCTGCTGGCGGCCCCCTG 120
pxo99a_5a             CCGGATAGGGTTCAGCCGACTGCAGATCGGGGGGGGGCTCCGCCTGCTGGCGGCCCCCTG 120
pxo86_tal5a           CCGGATAGGGTTCAGCCGACTGCAGATCGGGGGGGGGCTCCGCCTGCTGGCGGCCCCCTG 120
maff311018_tal3a      CCGGATAGGGTTCAGCCGACTGCAGATCGGGGGGGGGCTCCGCCTGCTGGCGGCCCCCTG 120
cfbp7342_tal8         CCGGATGGGGTTCAGCCGACTGCAGATCGTGGGGTGTCTGCGCCTGCTGGCAGCCCTCTG 120
                      ** *** ********************** **** * ** ******* *** **** ***

avrBs3                GATGGCTTGCCCGCTCGGCGGACGATGTCCCGGACCCGGCTGCCATCTCCCCCTGCCCCC 180
bls256_tal2g          GATGGTTTGCCCGCTCGGCGGACGATGTCCCGGACCCGGCTGCCATCTCCCCCTGCGCCC 180
avrXa27               GATGGCTTGCCCGCTCGGCGGACGATGTCCCGGACCCGGCTGCCATCTCCCCCTGCGCCC 180
pxo99a_5a             GATGGCTTGCCCGCTCGGCGGACGATGTCCCGGACCCGGCTGCCATCTCCCCCTGCGCCC 180
pxo86_tal5a           GATGGCTTGCCCGCTCGGCGGACGATGTCCCGGACCCGGCTGCCATCTCCCCCTGCGCCC 180
maff311018_tal3a      GATGGCTTGCCCGCTCGGCGGACGATGTCCCGGACCCGGCTGCCATCTCCCCCTGCGCCC 180
cfbp7342_tal8         GATGGCTTGCCCGCTCGGCGGACGATGTCCCGGACCCGGCTGCCATCTCCCCCTGCGCCC 180
                      ***** ************************************************** ***

avrBs3                TCACCTGCGTTCTCGGCGGGCAGCTTCAGTGACCTGTTACGTCAGTTCGATCCGTCACTT 240
bls256_tal2g          TCGCCTGCGTTCTCGGCGGGCAGCTTCAGCGATCTGCTCCGTCCGTTCGATCCGTCGCTT 240
avrXa27               TCGCCTGCGTTCTCGGCGGGCAGCTTCAACGATCTGCTCCGTCAGTTCGATCCGTCGCTT 240
pxo99a_5a             TCGCCTGCGTTCCCGGCGGGCAGCTTCAGCGATCTACTCCGTCAAGTC------------ 228
pxo86_tal5a           TCGCCTGCGTTCCCGGCGGGCAGCTTCAGCGATCTACTCCGTCAAGTC------------ 228
maff311018_tal3a      TCGCCTGCGTTCCCGGCGGGCAGCTTCAGCGATCTGCTCCGTCAAGTC------------ 228
cfbp7342_tal8         TCGCCTGCGTTCTCGGCGGGCAGCTTCAGCGATCTGCTCCGTCCGTTCGATCCGTCGCTT 240
                      ** ********* ***************  ** **  * ****   **            

avrBs3                TTTAATACATCGCTTTTT---------------GATTCATTGCCTCCCTTCGGCGCTCAC 285
bls256_tal2g          CTTGATACATCGCTTCTT---------------GATTCGATGCCTGCCGTCGGCACGCCG 285
avrXa27               CTTGATACATCGCTTCTT---------------GATTCGATGCCTGCCGTCGGCACGCCG 285
pxo99a_5a             ---GATACATCGCTTCTT---------------GATTCGATGCCTGCCGTCGGCACGCCG 270
pxo86_tal5a           ---GATACATCGCTTCTT---------------GATTCGATGCCTGCCGTCGGCACGCCG 270
maff311018_tal3a      ---GATACATCGCTTCTT---------------GATTCGATGCCTGCCGTCGGCACGCCG 270
cfbp7342_tal8         CTTGATACATCGCTTCTTGATACATCGCTTCTTGATTCGATGCCTGCCGTCGGCACGCCG 300
                          *********** **               *****  ***** ** ***** * *  

avrBs3                CATACAGAGGCTGCCACAGGCGAGTGGGATGAGGTGCAATCGGGTCTGCGGGCAGCCGAC 345
bls256_tal2g          CATACAGCGGCTGCCCCAGCAGAGTGGGATGAGGCGCAATCGGGTCTGCGTGCAGCCGAT 345
avrXa27               CATACAGCGGCTGCCCCAGCAGAGTGGGATGAGGTGCAATCGGGTCTGCGTGCAGCCGAT 345
pxo99a_5a             CATACAGCGGCTGCCCCAGCAGAGTGGGATGAGATGCAATCGGGTCTGCGTGCAGCCGAT 330
pxo86_tal5a           CATACAGCGGCTGCCCCAGCAGAGTGGGATGAGATGCAATCGGGTCTGCGTGCAGCCGAT 330
maff311018_tal3a      CATACAGCGGCTGCCCCAGCAGAGTGGGATGAGATGCAATCGGGTCTGCGTGCAGCCGAT 330
cfbp7342_tal8         CATACAGCGGCTGCCCCAGCAGAGTGGGATGAGGTGCAATCGGCTCTGCGTGCAGCCGAT 360
                      ******* ******* ***  ************  ******** ****** ******** 

avrBs3                GCCCCCCCACCCACCATGCGCGTGGCTGTCACTGCCGCGCGGCCGCCGCGCGCCAAGCCG 405
bls256_tal2g          GACCCGCCACCCACCGTGCGTGTCGCTGTCACTGCCGCGCGGCCGCCGCGCGCCAAGCCG 405
avrXa27               GACCCGCCACCCACCGTGCGTGTCGCTGTCACTGCCGCGCGGCCGCCGCGCGCCAAGCCG 405
pxo99a_5a             GACCCGCCACCCACCGTGCGTGTCGCTGTCACTGCCGCGCGGCCGCCGCGCGCCAAGCCG 390
pxo86_tal5a           GACCCGCCACCCACCGTGCGTGTCGCTGTCACTGCCGCGCGGCCGCCGCGCGCCAAGCCG 390
maff311018_tal3a      GACCCGCCACCCACCGTGCGTGTCGCTGTCACTGCCGCGCGGCCGCCGCGCGCCAAGCCG 390
cfbp7342_tal8         GACCCGCCACCCACCGTGCGTGTCGCTGTCACTGCCGCGCGGCCGCCGCGCGCCAAGCCG 420
                      * *** ********* **** ** ************************************

avrBs3                GCGCCGCGACGACGTGCTGCGCAACCCTCCGACGCTTCGCCGGCCGCGCAGGTGGATCTA 465
bls256_tal2g          GCCCCGCGACGGCGTGCGGCGCAACCCTCCGACGCTTCGCCGGCCGCGCAGGTGGATCTA 465
avrXa27               GCCCCGCGACGGCGTGCGGCGCAACCCTCCGACGCTTCGCCGGCCGCGCAGGTGGATCTA 465
pxo99a_5a             GCCCCGCGACGGCGTGCGGCGCAACCCTCCGACGCTTCGCCGGCCGCGCAGGTGGATCTA 450
pxo86_tal5a           GCCCCGCGACGGCGTGCGGCGCAACCCTCCGACGCTTCGCCGGCCGCGCAGGTGGATCTA 450
maff311018_tal3a      GCCCCGCGACGGCGTGCGGCGCAACCCTCCGACGCTTCGCCGGCCGCGCAGGTGGATCTA 450
cfbp7342_tal8         GCCCCGCGACGGCGTGCTGCGCAACCCTCCGACGCTTCGCCGGCCGCGCAGGTGGATCTA 480
                      ** ******** ***** ******************************************

avrBs3                CGCACGCTCGGCTACAGCCAGCAGCAACAGGAGAAGATCAAACCGAAGGTTCGTTCGACA 525
bls256_tal2g          AGCACGCTCGGCTACAGTCAGCAGCAGCAAGAGAAGATCAAACCGAATGTGCGTTCGACA 525
avrXa27               CGCACGCTCGGCTACAGTCAGCAGCAGCAAGAGAAGATCAAATCGAAGGTGCGTTCGACA 525
pxo99a_5a             CGCACGCTCGGCTACAGTCAGCAGCAGCAAGAGAAGATCAAACCGAAGGTGCGTTCGACA 510
pxo86_tal5a           CGCACGCTCGGCTACAGTCAGCAGCAGCAAGAGAAGATCAAACCGAAGGTGCGTTCGACA 510
maff311018_tal3a      CGCACGCTCGGCTACAGTCAGCAGCAGCAAGAGAAGATCAAACCGAAGGTGCGTTCGACA 510
cfbp7342_tal8         CGCACGCTCGGCTACAGTCAGCAGCAGCAAGAGAAGATCGAACCGAATGTGCGTTCGACA 540
                       **************** ******** ** ********* ** **** ** *********

avrBs3                GTGGCGCAGCACCACGAGGCACTGGTCGGCCATGGGTTTACACACGCGCACATCGTTGCG 585
bls256_tal2g          GTGGCGCAGCACCACGAGGCACTGGTGGGCCATGGGTTTACACACGCGCACATCGTTGCG 585
avrXa27               GTGGCGCAGCACCACGAGGCACTGGTGGGCCATGGGTTTACACACGCGCACATCGTTGCG 585
pxo99a_5a             GTGGCGCAGCACCACGAGGCACTGGTGGGCCATGGGTTTACACACGCGCACATCGTTGCG 570
pxo86_tal5a           GTGGCGCAGCACCACGAGGCACTGGTGGGCCATGGGTTTACACACGCGCACATCGTTGCG 570
maff311018_tal3a      GTGGCGCAGCACCACGAGGCACTGGTGGGCCATGGGTTTACACACGCGCACATCGTTGCG 570
cfbp7342_tal8         GTGGCGCAGCACCACGAGGCACTGGTGGGCCATGGGTTTACACACGCGCACATCGTTGCG 600
                      ************************** *********************************

avrBs3                CTCAGCCAACACCCGGCAGCGTTAGGGACCGTCGCTGTCAAGTATCAGGACATGATCGCA 645
bls256_tal2g          CTCAGCCAACACCCGGCAGCGTTAGGGACCGTTGCTGTCACGTATCAGCACATAATCACG 645
avrXa27               CTCAGCCAACACCCGGCAGCGTTAGGGACCGTCGCTGTCAAGTATCAGCACATAATCACG 645
pxo99a_5a             CTCAGCCAACACCCGGCAGCGTTAGGGACCGTTGCTGTCACGTATCAGGACATAATCAGG 630
pxo86_tal5a           CTCAGCCAACACCCGGCAGCGTTAGGGACCGTTGCTGTCACGTATCAGGACATAATCAGG 630
maff311018_tal3a      CTCAGCCAACACCCGGCAGCGTTAGGGACCGTCGCTGTCAAGTATCAGCACATAATCACG 630
cfbp7342_tal8         CTCAGCCAACACCCGGCAGCGTTAGGGACCGTCGCTGTCACGTATCAGCACATAATCACG 660
                      ******************************** ******* ******* **** ***   

avrBs3                GCGTTGCCAGAGGCGACACACGAAGCGATCGTTGGCGTCGGCAAACAGTGGTCCGGCGCA 705
bls256_tal2g          GCGTTGCCAGAGGCGACACACGAAGACATCGTTGGCGTCGGCAAACAGTGGTCCGGCGCA 705
avrXa27               GCGTTGCCAGAGGCGACACACGAAGACATCGTTGGCGTCGGCAAACAGTGGTCCGGCGCA 705
pxo99a_5a             GCGTTGCCAGAGGCGACACACGAAGACATCGTTGGCGTCGGCAAACAGTGGTCCGGCGCA 690
pxo86_tal5a           GCGTTGCCAGAGGCGACACACGAAGACATCGTTGGCGTCGGCAAACAGTGGTCCGGCGCA 690
maff311018_tal3a      GCGTTGCCAGAGGCGACACACGAAGACATCGTTGGCGTCGGCAAACAGTGGTCCGGCGCA 690
cfbp7342_tal8         GCGTTGCCAGAGGCGACACGCGAAGACATCGTTGGCGTCGGCAAACAGTGGTCCGGCGCA 720
                      ******************* *****  *********************************

avrBs3                CGCGCTCTGGAGGCCTTGCTCACGGTGGCGGGAGAGTTGAGAGGTCCACCGTTACAGTTG 765
bls256_tal2g          CGCGCCCTGGAGGCCTTGCTCGCGGATGCGGGGGAGTTGAGAGGTCCGCCGTTACAGTTG 765
avrXa27               CGCGCCCTGGAGGCCTTGCTCACGAAGGCGGGGGAGTTGAGAGGTCCGCCGTTACAGTTG 765
pxo99a_5a             CGCGCCCTGGAGGCCTTGCTCACGGAGGCGGGGGAGTTGAGAGGTCCGCCGTTACAGTTG 750
pxo86_tal5a           CGCGCCCTGGAGGCCTTGCTCACGGAGGCGGGGGAGTTGAGAGGTCCGCCGTTACAGTTG 750
maff311018_tal3a      CGCGCCCTGGAGGCCTTGCTCACGAAGGCGGGGGAGTTGAGAGGTCCGCCGTTACAGTTG 750
cfbp7342_tal8         CGCGCCCTGGAGGCCTTGCTCACGAAGGCGGGGGAGTTGAGAGGTCCACCGTTACAGTTG 780
                      ***** *************** **   ***** ************** ************

avrBs3                GACACAGGCCAACTTCTCAAGATTGCAAAACGTGGCGGCGTGACCGCAGTGGAGGCAGTG 825
bls256_tal2g          GACACAGGCCAACTTCTCAAGATTGCAAAACGTGGCGGCGTGACCGCAGTGGAGGCAGTG 825
avrXa27               GACACAGGCCAACTTCTCAAGATTGCAAAACGTGGCGGCGTGACCGCAGTGGAGGCAGTG 825
pxo99a_5a             GACACAGGCCAACTTCTCAAGATTGCAAAACGTGGCGGCGTGACCGCAGTGGAGGCAGTG 810
pxo86_tal5a           GACACAGGCCAACTTCTCAAGATTGCAAAACGTGGCGGCGTGACCGCAGTGGAGGCAGTG 810
maff311018_tal3a      GACACAGGCCAACTTCTCAAGATTGCAAAACGTGGCGGCGTGACCGCAGTGGAGGCAGTG 810
cfbp7342_tal8         GACACAGGCCAACTTGTGAAGATTGCAAAACGTGGCGGCGTGACCGCAGTGGAGGCAGTG 840
                      *************** * ******************************************

avrBs3                CATGCATGGCGCAATGCACTGACGGGTGCCCCCCTGAAC 864
bls256_tal2g          CATGCATCGCGCAATGCACTGACGGGTGCCCCCCTGAAC 864
avrXa27               CATGCATCGCGCAATGCACTGACGGGTGCCCCCCTGAAC 864
pxo99a_5a             CATGCATGGCGCAATGCACTGACGGGTGCCCCCCTGAAC 849
pxo86_tal5a           CATGCATGGCGCAATGCACTGACGGGTGCCCCCCTGAAC 849
maff311018_tal3a      CATGCATGGCGCAATGCACTGACGGGTGCCCCCCTGAAC 849
cfbp7342_tal8         CATGCATGGCGCAATGCACTGACGGGTGCCCCCCTGAAC 879
                      ******* *******************************
