# Supplementary material
Source: publisher figshare collection journal article supplement (https://microbiology.figshare.com/articles/dataset/_/1545552)
Supplement: Supplementary file 1 [file 1 › File_S7_3_alignment.rtf]

Supplementary Material 
for

SMRT SEQUENCING OF XANTHOMONAS ORYZAE GENOMES REVEALS A DYNAMIC STRUCTURE AND COMPLEX TAL EFFECTOR GENE RELATIONSHIPS
Nicholas J. Booher1, Sara C. D. Carpenter1, Robert P. Sebra2, Li Wang1, Steven L. Salzberg3, Jan E. Leach4, and Adam J. Bogdanove1*
Address: 1 Plant Pathology and Plant-Microbe Biology Section, School of Integrative Plant Science, Cornell University, Ithaca, NY 14853 USA; 2 Icahn Institute for Genomics and Multiscale Biology and Department of Genetics & Genomic Sciences, Icahn School of Medicine at Mount Sinai, New York, NY 10029 USA; 3 Departments of Biomedical Engineering, Computer Science, and Biostatistics and Center for Computational Biology, Johns Hopkins University, Baltimore, MD 21205 USA; 4 Bioagricultural Sciences and Pest Management, Colorado State University, Ft. Collins, CO 80523 USA
*Corresponding author:  ajb7@cornell.edu


File S7. Alignment of tal gene 3' ends related to the 129 bp 3' end variant. Sequences of the 3' ends of the archetypal X. euvesicatoria avrBs3 gene, the BLS256 tal2g gene (representing Xoc tal genes), and avrXa27 (representing Xoo tal genes) are shown for comparison. The stop codon of each gene is highlighted. Genbank accessions for sequences included in the alignment are given in the legend to File S6, plus AY377126.2 for arp3, KF460460.1 for RS105, and KF447887.1 for JSB2-24.

avrBs3               AGCATTGTTGCCCAGTTATCTCGCCCTGATCCGGCGTTGGCCGCGTTGACCAACGACCAC 60
bls256_tal2g         AGCATTGTTGCCCAGTTATCTCGCCCTGATCCGGCGTTGGCCGCGTTGACCAACGACCAC 60
avrXa27              AGCATTGTTGCCCAGTTATCTCGCCCTGATCCGGCGTTGGCCGCGTTGACCAACGACCAC 60
arp3                 AGCATTGTTGCCCAGTTATCTCGCCCTGATCCGGCGTTGGCCGCGTTGACCAACGACCAC 60
pxo99a_tal3a         AGCATTGTTGCCCAGTTATCTCGCCCTGATCCGGCGTTGGCCGCGTTGACCAACGACCAC 60
pxo86_tal3           AGCATTGTTGCCCAGTTATCTCGCCCTGATCCGGCGTTGGCCGCGTTGACCAACGACCAC 60
bls256_tal2h         AGCATTGTTGCCCAGTTATCTCGCCGTGATCCGGCGTTGGCCGCGTTGACCAAGGACCAA 60
rs105_tal            AGCATTGTTGCCCAGTTATCTCGCCGTGATCCGGCGTTGGCCGCGTTGACCAAGGACCAA 60
jsb2-24_tal          AGCATTGTTGCCCAGTTATCTCGCCGTGATCCGGCGTTGGCCGCGTTGACCAAGGACCAA 60
cfpb7342_tal11g      AGCATTGTTGCCCAGTTATCTCGCCGTGATCCGGCGTTGGCCGCGTTGACCAACGACCAA 60
pxo86_tal6           AGCATTGTTGCCCAGTTATCTCGCCGTGATCCGGCGTTGGCCGCGTTGACCAACGACCAA 60
pxo99a_tal3b         AGCATTGTTGCCCAGTTATCTCGCCGTGATCCGGCGTTGGCCGCGTTGACCAACGACCAA 60
maff311018_tal5      AGCATTGTTGCCCAGTTATCTCGCCGTGATCCGGCGTTGGCCGCGTTGACCAACGACCAA 60
                     ************************* *************************** ***** 

avrBs3               CTCGTCGCCTTGGCCTGCCTCGGCGGACGTCCTGCGCTGGATGCAGTGAAAAAGGGATTG 120
bls256_tal2g         CTCGTCGCCTTGGCCTGCCTCGGCGGGCGTCCTGCCCTGGATGCAGTGAAAAAGGGATTG 120
avrXa27              CTCGTCGCCTTGGCCTGCCTCGGCGGACGTCCTGCCCTGGATGCAGTGAAAAAGGGATTG 120
arp3                 CTCGTCGCCTTGGCCTGCCTCGGCGGACGTCCTGCCCTGGATGCAGTGAAAAAGGGATTG 120
pxo99a_tal3a         CTCGTCGCCTTGGCCTGCCTCGGCGGACGTCCTGCCCTGGATGCAGTGAAAAAGGGATTG 120
pxo86_tal3           CTCGTCGCCTTGGCCTGCCTCGGCGGACGTCCTGCCCTGGATGCAGTGAAAAAGGGATTG 120
bls256_tal2h         CTCGTCGCCTTGGCCTGCTTCGGCGGACGTCCTGCC------------------------ 96
rs105_tal            CTCGTCGCCTTGGCCTGCTTCGGCGGACGTCCTGCC------------------------ 96
jsb2-24_tal          CTCGTCGCCTTGGCCTGCTTCGGCGGACGTCCTGCC------------------------ 96
cfpb7342_tal11g      CTCGTCGCCTTGGCCTGCCTCGGCGGACGTCCTGCC------------------------ 96
pxo86_tal6           CTCGTCGCCTTGGCCTGCCTCGGCGGACGTCCTGCC------------------------ 96
pxo99a_tal3b         CTCGTCGCCTTGGCCTGCCTCGGCGGACGTCCTGCC------------------------ 96
maff311018_tal5      CTCGTCGCCTTGGCCTGCCTCGGCGGACGTCCTGCC------------------------ 96
                     ****************** ******* ********                        

avrBs3               CCGCACGCGCCGGCCTTGATCAAAAGAACCAATCGCCGTATTCCCGAACGCACATCCCAT 180
bls256_tal2g         CCGCACGCGCCGGAATTCATCAGAAGAGTCAATCGCCGTATTGCCGAACGCACGTCCCAT 180
avrXa27              CCGCACGCGCCGGAATTGATCAGAAGAATCAATCGCCGTATTCCCGAACGCACGTCCCAT 180
arp3                 CCGCACGCGCCGGAATTGATCAGAAGAGTCAATAGCCGTATTGGCGAACGCACGTCCCAT 180
pxo99a_tal3a         CCGCACGCGCCGGAATTGATCAGAAGAGTCAATAGCCGTATTGGCGAACGCACGTCCCAT 180
pxo86_tal3           CCGCACGCGCCGGAATTGATCAGAAGAGTCAATAGCCGTATTGGCGAACGCACGTCCCAT 180
bls256_tal2h         ------------------------------------------------------------
rs105_tal            ------------------------------------------------------------
jsb2-24_tal          ------------------------------------------------------------
cfpb7342_tal11g      ------------------------------------------------------------
pxo86_tal6           ------------------------------------------------------------
pxo99a_tal3b         ------------------------------------------------------------
maff311018_tal5      ------------------------------------------------------------
                                                                                 

avrBs3               CGCGTTGCCGACCACGCGCAAGTGGTTCGCGTGCTGGGTTTTTTCCAGTGCCACTCCCAC 240
bls256_tal2g         CGCGTTGCCGACTACGCGCAAGTGGTTCGCGTGCTGGAGTTTTTCCAGTGCCACTCCCAC 240
avrXa27              CGCGTTGCCGACCTCGCGCACGTGGTGCGCGTGCTTGGTTTTTTCCAGAGCCACTCCCAC 240
arp3                 CGCGTTGCCGACCTCGCGCACGTGGTGCGCGTGCTTGGTTTTTTCCAGAGCCACTCCCAC 240
pxo99a_tal3a         CGCGTTGCCGACCTCGCGCACGTGGTGCGCGTGCTTGGTTTTTTCCAGAGCCACTCCCAC 240
pxo86_tal3           CGCGTTGCCGACCTCGCGCACGTGGTGCGCGTGCTTGGTTTTTTCCAGAGCCACTCCCAC 240
bls256_tal2h         ------------------------------------------------------------
rs105_tal            ------------------------------------------------------------
jsb2-24_tal          ------------------------------------------------------------
cfpb7342_tal11g      ------------------------------------------------------------
pxo86_tal6           ------------------------------------------------------------
pxo99a_tal3b         ------------------------------------------------------------
maff311018_tal5      ------------------------------------------------------------
                                                                                 


avrBs3               CCAGCGCAAGCATTTGATGACGCCATGACGCAGTTCGGGATGAGCAGGCACGGGTTGTTA 300
bls256_tal2g         CCAGCGCACGCATTTGATGAGGCCATGACGCAGTTCGGGATGAGCAGGCAAGGGTTGGTA 300
avrXa27              CCAGCGCAAGCATTCGATGACGCCATGACGCAGTTCGGGATGAGCAGGCACGGGTTGGTA 300
arp3                 CCAGCGCAAGCATTCGATGACGCCATGACGCAGTTCGGGATGAGCAGGCACGGGTTGGTA 300
pxo99a_tal3a         CCAGCGCAAGCATTCGATGACGCCATGACGCAGTTCGGGATGAGCAGGCACGGGTTGGTA 300
pxo86_tal3           CCAGCGCAAGCATTCGATGACGCCATGACGCAGTTCGGGATGAGCAGGCACGGGTTGGTA 300
bls256_tal2h         ------------------------------------------------------------
rs105_tal            ------------------------------------------------------------
jsb2-24_tal          ------------------------------------------------------------
cfpb7342_tal11g      ------------------------------------------------------------
pxo86_tal6           ------------------------------------------------------------
pxo99a_tal3b         ------------------------------------------------------------
maff311018_tal5      ------------------------------------------------------------
                                                                                 

avrBs3               CAGCTCTTTCGCAGAGTGGGCGTCACCGAACTCGAAGCCCGCAGTGGAACGCTCCCCCCA 360
bls256_tal2g         CAGCTCTTTCGCAGAGTGGGCGTCACCGAACTCGAAGCCCGCTGCGGAACGCTCCCCCCA 360
avrXa27              CAGCTCTTTCGCAGAGTGGGCGTCACCGAATTCGAAGCCCGCTGCGGAACGCTCCCCCCA 360
arp3                 CAGCTCTTTCGCAGAGTGGGCGTCACCGAATTCGAAGCCCGCTGCGGAACTATCCCCCCA 360
pxo99a_tal3a         CAGCTCTTTCGCAGAGTGGGCGTCACCGAATTCGAAGCCCGCTGCGGAACTATCCCCCCA 360
pxo86_tal3           CAGCTCTTTCGCAGAGTGGGCGTCACCGAATTCGAAGCCCGCTGCGGAACTATCCCCCCA 360
bls256_tal2h         ------------------------------------------------------------
rs105_tal            ------------------------------------------------------------
jsb2-24_tal          ------------------------------------------------------------
cfpb7342_tal11g      ------------------------------------------------------------
pxo86_tal6           ------------------------------------------------------------
pxo99a_tal3b         ------------------------------------------------------------
maff311018_tal5      ------------------------------------------------------------
                                                                                 

avrBs3               GCCTCGCAGCGTTGGGACCGTATCCTCCAGGCATCAGGGATGAAAAGGGCCAAACCGTCC 420
bls256_tal2g         GCCTCGCAGCGTTGGGACCGTATCCTCCAGGCATCAGGGATGAAAAGGGGCAAACCGTCC 420
avrXa27              GCCTCGCAGCGTTGGGACCGTATCCTCCAGGCATCAGGGATGAAAAGGGCCAAACCGTCC 420
arp3                 GCCTCGCAGCGTTGGGACCGTATCCTCCAGGCATCAGGGACGAAAAGGGCCAAACCGTCC 420
pxo99a_tal3a         GCCTCGCAGCGTTGGGACCGTATCCTCCAGGCATCAGGGACGAAAAGGGCCAAACCGTCC 420
pxo86_tal3           GCCTCGCAGCGTTGGGACCGTATCCTCCAGGCATCAGGGACGAAAAGGGCCAAACCGTCC 420
bls256_tal2h         ------------------------------------------------------------
rs105_tal            ------------------------------------------------------------
jsb2-24_tal          ------------------------------------------------------------
cfpb7342_tal11g      ------------------------------------------------------------
pxo86_tal6           ------------------------------------------------------------
pxo99a_tal3b         ------------------------------------------------------------
maff311018_tal5      ------------------------------------------------------------
                                                                                 

avrBs3               CCTACTTCAACTCAAACGCCGGATCAGGCGTCTTTGCATGCATTCGCCGATTCGCTGGAG 480
bls256_tal2g         CCTACTTCAGCTCAAACCCCGGATCAGGCGTCTTTGCATGGATTCGCCGATTCGCTGGAG 480
avrXa27              CCTACTTCAGCTCAAACGCCGGATCAGGCGTCTTTGCATGCATTCGCCGATTCGCTGGAG 480
arp3                 CCTACTTCAGCTCAGACGCCGGATCAGGCGTCTTTGCATGCATTCCCCGACTCGCTGGAG 480
pxo99a_tal3a         CCTACTTCAGCTCAGACGCCGGATCAGGCGTCTTTGCATGCATTCCCCGACTCGCTGGAG 480
pxo86_tal3           CCTACTTCAGCTCAGACGCCGGATCAGGCGTCTTTGCATGCATTCCCCGACTCGCTGGAG 480
bls256_tal2h         ------------------------------------------------------------
rs105_tal            ------------------------------------------------------------
jsb2-24_tal          ------------------------------------------------------------
cfpb7342_tal11g      ------------------------------------------------------------
pxo86_tal6           ------------------------------------------------------------
pxo99a_tal3b         ------------------------------------------------------------
maff311018_tal5      ------------------------------------------------------------
                                                                                 


avrBs3               CGTGACCTTGATGCGCCTAGCCCAATGCACGAGGGAGATCAGACGCGGGCAAGCAGCCGT 540
bls256_tal2g         CGTGACCTTGATGCGCCCAGCCCAATGCACGAGGGAGATCAGACGCGGGCAAGCAGCCGT 540
avrXa27              CGTGACCTTGATGCGCCCAGCCCAATGCACGAGGGAGATCAGACGCGGGCAAGCAGCCGT 540
arp3                 CGTGACCTTGATGCGCCCAGCCCAATGCACGAGGGAGATCAGACGCGGGCAAGCAGACGT 540
pxo99a_tal3a         CGTGACCTTGATGCGCCCAGCCCAATGCACGAGGGAGATCAGACGCGGGCAAGCAGACGT 540
pxo86_tal3           CGTGACCTTGATGCGCCCAGCCCAATGCACGAGGGAGATCAGACGCGGGCAAGCAGACGT 540
bls256_tal2h         ------------------------------------------------------------
rs105_tal            ------------------------------------------------------------
jsb2-24_tal          ------------------------------------------------------------
cfpb7342_tal11g      ------------------------------------------------------------
pxo86_tal6           ------------------------------------------------------------
pxo99a_tal3b         ------------------------------------------------------------
maff311018_tal5      ------------------------------------------------------------
                                                                                 

avrBs3               AAACGGTCCCGATCGGATCGTGCTGTCACCGGTCCCTCCGCACAGCAATCGTTCGAGGTG 600
bls256_tal2g         AAACGGTCCCGATCGGATCATGCTGTCACCGGCCCCTCCGCACAGCAGGCTGTCGAGGTG 600
avrXa27              AAACGGTCCCGATCGGATCGTGCTGTCACCGGCCCCTCCACACAGCAATCTTTCGAGGTG 600
arp3                 AAACGGTCCCGATCGGATCGTGCTGTCACCGACCCCTCCGCACAGCAATCTTTCGAGGTG 600
pxo99a_tal3a         AAACGGTCCTGATCGGATCGTGCTGTCACCGACCCCTCCGCACAGCAATCTTTCGAGGTG 600
pxo86_tal3           AAACGGTCCTGATCGGATCGTGCTGTCACCGACCCCTCCGCACAGCAATCTTTCGAGGTG 600
bls256_tal2h         ------------------------------------------------------------
rs105_tal            ------------------------------------------------------------
jsb2-24_tal          ------------------------------------------------------------
cfpb7342_tal11g      ------------------------------------------------------------
pxo86_tal6           ------------------------------------------------------------
pxo99a_tal3b         ------------------------------------------------------------
maff311018_tal5      ------------------------------------------------------------
                                                                                 

avrBs3               CGCGTTCCCGAACAGCGCGATGCGCTGCATTTGCCCCTCAGTTGGAGGGTAAAACGCCCG 660
bls256_tal2g         CGCGTTCCCGAACAGCGCGATGCGCTGCATTTGCCCCTCAGCTGGAGTGTAAAACGCCCG 660
avrXa27              CGCGTTCCCGAACAGCGCGATGCGCTGCATTTGCCCCTCAGCTGGAGGGTAAAACGCCCG 660
arp3                 CGCGTTCCCGAACAGCACGATGCGCTGCATTTGCCCCTCAGCTGGAGGGTAAAACGCCCG 660
pxo99a_tal3a         CGCGTTCCCGAACAGCACGATGCGCTGCATTTGCCCCTCAGCTGGAGGGTAAAACGCCCG 660
pxo86_tal3           CGCGTTCCCGAACAGCACGATGCGCTGCATTTGCCCCTCAGCTGGAGGGTAAAACGCCCG 660
bls256_tal2h         ------------------------------------------------------------
rs105_tal            ------------------------------------------------------------
jsb2-24_tal          ------------------------------------------------------------
cfpb7342_tal11g      ------------------------------------------------------------
pxo86_tal6           ------------------------------------------------------------
pxo99a_tal3b         ------------------------------------------------------------
maff311018_tal5      ------------------------------------------------------------
                                                                                 

avrBs3               CGTACCAGTATCGGGGGCGGCCTCCCGGATCCTGGTACGCCCACGGCTGCCGACCTGGCA 720
bls256_tal2g         CGTACCAGGATCGGGGGCGGCCTCCCGGATCCTGGTACGCCCATGGCTGCCGACCTGGCA 720
avrXa27              CGTACCAGGATCGGGGGCGGCCTCCCGGATCCTGGTACGCCCATCGCTGCCGACCTGGCA 720
arp3                 CGTACCAGGATCGGGGGCGGCCTCCCGGATCCTGGTACGCCCATGGTTGCCGACCTGGCA 720
pxo99a_tal3a         CGTACCAGGATCGGGGGCGGCCTCCCGGATCCTGGTACGCCCATGGTTGCCGACCTGGCA 720
pxo86_tal3           CGTACCAGGATCGGGGGCGGCCTCCCGGATCCTGGTACGCCCATGGTTGCCGACCTGGCA 720
bls256_tal2h         ------------------------------------------------------------
rs105_tal            ------------------------------------------------------------
jsb2-24_tal          ------------------------------------------------------------
cfpb7342_tal11g      ------------------------------------------------------------
pxo86_tal6           ------------------------------------------------------------
pxo99a_tal3b         ------------------------------------------------------------
maff311018_tal5      ------------------------------------------------------------
                                                                                 


avrBs3               GCGTCCAGCACCGTGATGCGGGAACAAGATGAGGACCCCTTCGCAGGGGCAGCGGATGAT 780
bls256_tal2g         GCGTCCAGCACCGTGATGTGGGAACAAGATGCGGCCCCCTTCGCAGGGGCAGCGGATGAT 780
avrXa27              GCGTCCAGCACCGTGATGTGGGAACAAGATGCGGCCCCCTTCGCAGGGGCAGCGGATGAT 780
arp3                 GCGTCCAGCACCGTGATGTGGGAACAAGATGCGGCCCCCTTCGCAGGGGCAGCGGATGAT 780
pxo99a_tal3a         GCGTCCAGCACCGTGATGTGGGAACAAGATGCGGCCCCCTTCGCAGGGGCAGCGGATGAT 780
pxo86_tal3           GCGTCCAGCACCGTGATGTGGGAACAAGATGCGGCCCCCTTCGCAGGGGCAGCGGATGAT 780
bls256_tal2h         ------------------------------------------------------------
rs105_tal            ------------------------------------------------------------
jsb2-24_tal          ------------------------------------------------------------
cfpb7342_tal11g      ------------------------------------------------------------
pxo86_tal6           ------------------------------------------------------------
pxo99a_tal3b         ------------------------------------------------------------
maff311018_tal5      ------------------------------------------------------------
                                                                                 

avrBs3               TTCCCGGCATTCAACGAAGAGGAGCTCGCATGGTTGATGGAGCTATTGCCTCAGTGAAGT 840
bls256_tal2g         TTCCCGGCATTCAACGAAGAGGAACTCGCATGGTTGATGGAGCTATTGCCTCAGTGAGGC 840
avrXa27              TTCCCGGCATTCAACGAAGAGGAGCTCGCATGGTTGATGGAGCTATTGCCTCAGTCAGGC 840
arp3                 TTCCCGGCATTCAACGAAGAGGAGCTCGCATGGTTGATGGAGCTATTGCCTCAGTCAGGC 840
pxo99a_tal3a         TTCCCGGCATTCAACGAAGAGGAGCTCGCATGGTTGATGGAGCTATTGCCTCAGTGAGGC 840
pxo86_tal3           TTCCCGGCATTCAACGAAGAGGAGCTCGCATGGTTGATGGAGCTATTGCCTCAGTGAGGC 840
bls256_tal2h         ----CCGCATTCAAGGAAGAGGAAATCGCATGATTGATGGAGCTATTGCCTCAGTGAGGC 152
rs105_tal            ----CCGCATTCAAGGAAGAGGAAATCGCATGATTGATGGAGCTATTGCCTCAGTGAGGC 152
jsb2-24_tal          ----CCGCATTCAAGGAAGAGGAAATCGCATGATTGATGGAGCTATTGCCTCAGTGAGGC 152
cfpb7342_tal11g      ----CCGCATTCAAGGAAGAGGAAATCGCATGATTGATGGAGCTATTGCCTCAGTGAGGC 152
pxo86_tal6           ----CCGCATTCAAGGAAGAGGAAATCGCATGATTGATGGAGCTATTGCCTCAGTGAGGC 152
pxo99a_tal3b         ----CCGCATTCAAGGAAGAGGAAATCGCATGATTGATGGAGCTATTGCCTCAGTGAGGC 152
maff311018_tal5      ----CCGCATTCAAGGAAGAGGAAATCGCATGATTGATGGAGCTATTGCCTCAGTGAGGC 152
                         * ******** ********  ******* ********************** * * 

avrBs3               GAGGCTCAGTCGGTGACTACC	861
bls256_tal2g         TCGACGTCCTCCCCTCCTGAG	861
avrXa27              TCAGTCGGAGGGACGATCTGA	861
arp3                 TCAGTCGGAGGGACGATCTGA      861
pxo99a_tal3a         TCAGTCGGGGGACTATCTGAG	861
pxo86_tal3           TCAGTCGGGGGACTATCTGAG	861
bls256_tal2h         TCAGTCGGGGGACTATCTGAG	173
rs105_tal            TCAGTCGGGGGACTATCTGAG	173
jsb2-24_tal          TCAGTCGGGGGACTATCTGAG	173
cfpb7342_tal11g      TCAGTCGGGGGACTATCTGAG	173
pxo86_tal6           TCAGTCGGGGGACTATCTGAG	173
pxo99a_tal3b         TCAGTCGGGGGACTATCTGAG	173
maff311018_tal5      TCAGTCGGGGGACTATCTGAG	173                                          
