# Supplementary material
Source: publisher figshare collection journal article supplement (https://microbiology.figshare.com/articles/dataset/_/1545552)
Supplement: Supplementary file 1 [file 1 › File_S8_5_del_alignment.rtf]

Supplementary Material 
for

SMRT SEQUENCING OF XANTHOMONAS ORYZAE GENOMES REVEALS A DYNAMIC STRUCTURE AND COMPLEX TAL EFFECTOR GENE RELATIONSHIPS
Nicholas J. Booher1, Sara C. D. Carpenter1, Robert P. Sebra2, Li Wang1, Steven L. Salzberg3, Jan E. Leach4, and Adam J. Bogdanove1*
Address: 1 Plant Pathology and Plant-Microbe Biology Section, School of Integrative Plant Science, Cornell University, Ithaca, NY 14853 USA; 2 Icahn Institute for Genomics and Multiscale Biology and Department of Genetics & Genomic Sciences, Icahn School of Medicine at Mount Sinai, New York, NY 10029 USA; 3 Departments of Biomedical Engineering, Computer Science, and Biostatistics and Center for Computational Biology, Johns Hopkins University, Baltimore, MD 21205 USA; 4 Bioagricultural Sciences and Pest Management, Colorado State University, Ft. Collins, CO 80523 USA
*Corresponding author:  ajb7@cornell.edu


File S8. Alignment of tal gene 5' ends with large deletions that also have 3' ends related to the 129 bp 3' variant. Sequences of the 5' ends of the archetypal X. euvesicatoria avrBs3 gene, the BLS256 tal2g gene (representing Xoc tal genes), and avrXa27 (representing Xoo tal genes) are shown for comparison. Genbank accessions for sequences included in the alignment are given in the legend to File S6.

avrBs3               ATGGATCCCATTCGTTCGCGCACACCAAGTCCTGCCCGCGAGCTTCTGCCCGGACCCCAA 60
bls256_tal2g         ATGGATCCCATTCGTCCGCGCAGGCCAAGTCCTGCCCGCGAGCCTCTGCCCGGACCCCAA 60
avrXa27              ATGGATCCCATTCGTTCGCGCACGCCAAGTCCTGCCCGCGAGCTTCTGCCCGGACCCCAA 60
arp3                 ATGGATCCCATTCGTTCGCGCACGCCAAGTCCTGCCCGCGAGCCTCTGCCCGGACCCCAA 60
pxo99a_tal3a         ATGGATCCCATTCGTTCGCGCACGCCAAGTCCTGCCCGCGAGCCTCTGCCCGGACCCCAA 60
pxo86_tal3           ATGGATCCCATTCGTTCGCGCACGCCAAGTCCTGCCCGCGAGCCTCTGCCCGGACCCCAA 60
bls256_tal2h         ATGGATCCCATTCGTTCACGCACGCCAAGTCCTGCCCGCGAGCCTCTGCCCGGACCCCAA 60
rs105_tal            ATGGATCCCATTCGTTCACGCACGCCAAGTCCTGCCCGCGAGCCTCTGCCCGGACCCCAA 60
jsb2-24_tal          ATGGATCCCATTCGTTCACGCACGCCAAGTCCTGCCCGCGAGGGTCTGCCCGGACCCCAA 60
pxo86_tal6           ATGGATCCCATTCGTTCGCGCACGCCAAGTCCTGCCCGCGAGCCTCTGCCCGGACCCCAA 60
pxo99a_tal3b         ATGGATCCCATTCGTTCGCGCACGCCAAGTCCTGCCCGCGAGCCTCTGCCCGGACCCCAA 60
maff311018_tal5      ATGGATCCCATTCGTTCGCGCACGCCAAGTCCTGCCCGCGAGCCTCTGCCCGGACCCCAA 60
                     *************** * ****  ******************  ****************

avrBs3               CCCGATGGGGTTCAGCCGACTGCAGATCGTGGGGTGTCTCCGCCTGCCGGCGGCCCCCTG 120
bls256_tal2g         CCGGATGGGGTTCAGCCGACTGCAGATCGGGGGGTGTCTGCGCCTGCTGGCGGCCCTCTG 120
avrXa27              CCGGATAGGGTTCAGCCGACTGCAGATCGGGGGGGGGCTCCGCCTGCTGGCGGCCCCCTG 120
arp3                 CCGGATAGGGTTCAGCCGACTGCAGATCGTGGGGTGTCTGCGCCTGCTGGCAGCCCTCTG 120
pxo99a_tal3a         CCGGATAGGGTTCAGCCGACTGCAGATCGTGGGGTGTCTGCGCCTGCTGGCAGCCCTCTG 120
pxo86_tal3           CCGGATAGGGTTCAGCCGACTGCAGATCGTGGGGTGTCTGCGCCTGCTGGCAGCCCTCTG 120
bls256_tal2h         CCGGATAGGGTTCAGCCGACTGCAGATCGTGGGGTGTCTGCGCCTGCTGGCGGCCCCCTG 120
rs105_tal            CCGGATAGGGTTCAGCCGACTGCAGATCGTGGGGTGTCTGCGCCTGCTGGCGGCCCCCTG 120
jsb2-24_tal          CCGGATAGGGTTCAGCCGACTGCAGATCGTGGGGTGTCTGCGCCTGCTGGCAGCCCTCTG 120
pxo86_tal6           CCGGATAGGGTTCAGCCGACTGCAGATCGTGGGGTGTCTGCGCCTGCTGGCAGCCCTCTG 120
pxo99a_tal3b         CCGGATAGGGTTCAGCCGACTGCAGATCGTGGGGTGTCTGCGCCTGCTGGCAGCCCTCTG 120
maff311018_tal5      CCGGATAGGGTTCAGCCGACTGCAGATCGTGGGGTGTCTGCGCCTGCTGGCAGCCCTCTG 120
                     ** *** ********************** **** * ** ******* *** **** ***

avrBs3               GATGGCTTGCCCGCTCGGCGGACGATGTCCCGGACCCGGCTGCCATCTCCCCCTGCCCCC 180
bls256_tal2g         GATGGTTTGCCCGCTCGGCGGACGATGTCCCGGACCCGGCTGCCATCTCCCCCTGCGCCC 180
avrXa27              GATGGCTTGCCCGCTCGGCGGACGATGTCCCGGACCCGGCTGCCATCTCCCCCTGCGCCC 180
arp3                 GATGGCTTGCCCGCTCGGCGGACGGTGTCCCGGACCCGGCTGCCATCTCCCCCTGCCCCC 180
pxo99a_tal3a         GATGGCTTGCCCGCTCGGCGGACGGTGTCCCGGACCCGGCTGCCATCTCCCCCTGCCCCC 180
pxo86_tal3           GATGGCTTGCCCGCTCGGCGGACGGTGTCCCGGACCCGGCTGCCATCTCCCCCTGCCCCC 180
bls256_tal2h         GATGCCTTGCCCGCTCGGCGGACGGTGTCCCGGACCCGGCTGCCATCTCCCCCTGCGCCC 180
rs105_tal            GATGCCTTGCCCGCTCGGCGGACGGTGTCCCGGACCCGGCTGCCATCTCCCCCTGCGCCC 180
jsb2-24_tal          GATGGCTTGCCCGCTCGGCGGACGGTGTCCCGGACCCGGCTGCCATCTCCCCCTGCCCCC 180
pxo86_tal6           GATGGCTTGCCCGCTCGGCGGACGGTGTCCCGGACCCGGCTGCCATCTCCCCCTGCCCCC 180
pxo99a_tal3b         GATGGCTTGCCCGCTCGGCGGACGGTGTCCCGGACCCGGCTGCCATCTCCCCCTGCCCCC 180
maff311018_tal5      GATGGCTTGCCCGCTCGGCGGACGGTGTCCCGGACCCGGCTGCCATCTCCCCCTGCCCCC 180
                     ****  ****************** ******************************* ***

avrBs3               TCACCTGCGTTCTCGGCGGGCAGCTTCAGTGACCTGTTACGTCAGTTCGATCCGTCACTT 240
bls256_tal2g         TCGCCTGCGTTCTCGGCGGGCAGCTTCAGCGATCTGCTCCGTCCGTTCGATCCGTCGCTT 240
avrXa27              TCGCCTGCGTTCTCGGCGGGCAGCTTCAACGATCTGCTCCGTCAGTTCGATCCGTCGCTT 240
arp3                 TTGCCTGCGTTCTCGGCGGGCAGCTCCACCGATCGGCTCCGTCAGTTCGATCCGTCGCTT 240
pxo99a_tal3a         TTGCCTGCGTTCTCGGCGGGCAGCTCCACCGATCGGCTCCGTCCGTTCGATCCGTCGCTT 240
pxo86_tal3           TTGCCTGCGTTCTCGGCGGGCAGCTCCACCGATCGGCTCCGTCCGTTCGATCCGTCGCTT 240
bls256_tal2h         TTGCCTGCGTTCTCGGCGGGCAGCTCCACCGATCGGCTCCGTCCGTTCGATCCGTCGCTT 240
rs105_tal            TTGCCTGCGTTCTCGGCGGGCAGCTCCACCGATCGGCTCCGTCCGTTCGATCCGTCGCTT 240
jsb2-24_tal          TTGCCTGCGTTCTCGGCGGGCAGCTCCACCGATCGGCTCCGTCCGTTCGATCCGTCGCTT 240
pxo86_tal6           TTGCCTGCGTTCTCGGCGGGCAGCTCCACCGATCGGCTCCGTCCGTTCGATCCGTCGCTT 240
pxo99a_tal3b         TTGCCTGCGTTCTCGGCGGGCAGCTCCACCGATCGGCTCCGTCCGTTCGATCCGTCGCTT 240
maff311018_tal5      TTGCCTGCGTTCTCGGCGGGCAGCTCCACCGATCGGCTCCGTCCGTTCGATCCGTCGCTT 240
                     *  ********************** **  ** * * * **** ************ ***

avrBs3               TTTAATACATCGCTTTTTGATTCATTGCCTCCCTTCGGCGCTCACCATACAGAGGCTGCC 300
bls256_tal2g         CTTGATACATCGCTTCTTGATTCGATGCCTGCCGTCGGCACGCCGCATACAGCGGCTGCC 300
avrXa27              CTTGATACATCGCTTCTTGATTCGATGCCTGCCGTCGGCACGCCGCATACAGCGGCTGCC 300
arp3                 CCTGATACATCGCTTTTTGATTCGATGCCTGCCGTCGGCACGCCTCATACAGAGGCTGCC 300
pxo99a_tal3a         CCTGATACATCGCTTTTTGATTCGATGCCTGCCGTCGGCACGCCTCATACAGAGGCTGCC 300
pxo86_tal3           CCTGATACATCGCTTTTTGATTCGATGCCTGCCGTCGGCACGCCTCATACAGAGGCTGCC 300
bls256_tal2h         CCTGATACATCGCTTTTTGATTCGATGCCTGCCGTCGGCACGCCGCATACAGAGGCTGCC 300
rs105_tal            CCTGATACATCGCTTTTTGATTCGATGCCTGCCGTCGGCACGCCGCATACAGAGGCTGCC 300
jsb2-24_tal          CCTGATACATCGCTTTTTGATTCGATGCCTGCCGTCGGCACGCCGCATACAGAGGCTGCC 300
pxo86_tal6           CCTGATACATCGCTTTTTGATTCGATGCCTGCCGTCGGCACGCCTCATACAGAGGCTGCC 300
pxo99a_tal3b         CCTGATACATCGCTTTTTGATTCGATGCCTGCCGTCGGCACGCCTCATACAGAGGCTGCC 300
maff311018_tal5      CCTGATACATCGCTTTTTGATTCGATGCCTGCCGTCGGCACGCCTCATACAGAGGCTGCC 300
                       * *********** *******  ***** ** ***** * *  ******* *******

avrBs3               ACAGGCGAGTGGGATGAGGTGCAATCGGGTCTGCGGGCAGCCGACGCCCCCCCACCCACC 360
bls256_tal2g         CCAGCAGAGTGGGATGAGGCGCAATCGGGTCTGCGTGCAGCCGATGACCCGCCACCCACC 360
avrXa27              CCAGCAGAGTGGGATGAGGTGCAATCGGGTCTGCGTGCAGCCGATGACCCGCCACCCACC 360
arp3                 CCAGCAGAC--------------------------------------------------- 309
pxo99a_tal3a         CCAGCAGAC--------------------------------------------------- 309
pxo86_tal3           CCAGCAGAC--------------------------------------------------- 309
bls256_tal2h         CCAGCAGAC--------------------------------------------------- 309
rs105_tal            CCAGCAGAC--------------------------------------------------- 309
jsb2-24_tal          CCAGCAGAC--------------------------------------------------- 309
pxo86_tal6           CCAGCAGAC--------------------------------------------------- 309
pxo99a_tal3b         CCAGCAGAC--------------------------------------------------- 309
maff311018_tal5      CCAGCAGAC--------------------------------------------------- 309
                      ***  **                                                    

avrBs3               ATGCGCGTGGCTGTCACTGCCGCGCGGCCGCCGCGCGCCAAGCCGGCGCCGCGACGACGT 420
bls256_tal2g         GTGCGTGTCGCTGTCACTGCCGCGCGGCCGCCGCGCGCCAAGCCGGCCCCGCGACGGCGT 420
avrXa27              GTGCGTGTCGCTGTCACTGCCGCGCGGCCGCCGCGCGCCAAGCCGGCCCCGCGACGGCGT 420
arp3                 ------------------------------------------------------------
pxo99a_tal3a         ------------------------------------------------------------
pxo86_tal3           ------------------------------------------------------------
bls256_tal2h         ------------------------------------------------------------
rs105_tal            ------------------------------------------------------------
jsb2-24_tal          ------------------------------------------------------------
pxo86_tal6           ------------------------------------------------------------
pxo99a_tal3b         ------------------------------------------------------------
maff311018_tal5      ------------------------------------------------------------
                                                                                 

avrBs3               GCTGCGCAACCCTCCGACGCTTCGCCGGCCGCGCAGGTGGATCTACGCACGCTCGGCTAC 480
bls256_tal2g         GCGGCGCAACCCTCCGACGCTTCGCCGGCCGCGCAGGTGGATCTAAGCACGCTCGGCTAC 480
avrXa27              GCGGCGCAACCCTCCGACGCTTCGCCGGCCGCGCAGGTGGATCTACGCACGCTCGGCTAC 480
arp3                 ------------------ACTTCGCCGGCCGCGCAGGTGGATCTACTCACGCTC------ 345
pxo99a_tal3a         ------------------ACTTCGCCGGCCGCGCAGGTGGATCTACTCACGCTC------ 345
pxo86_tal3           ------------------ACTTCGCCGGCCGCGCAGGTGGATCTACTCACGCTC------ 345
bls256_tal2h         ------------------ACTTCGCCGGCCGCGCAGGTGGATCTACTCACGCTC------ 345
rs105_tal            ------------------ACTTCGCCGGCCGCGCAGGTGGATCTACTCACGCTC------ 345
jsb2-24_tal          ------------------ACTTCGCCGGCCGCGCAGGTGGATCTACTCACGCTC------ 345
pxo86_tal6           ------------------ACTTCGCCGGCCGCGCAGGTGGATCTACTCACGCTC------ 345
pxo99a_tal3b         ------------------ACTTCGCCGGCCGCGCAGGTGGATCTACTCACGCTC------ 345
maff311018_tal5      ------------------ACTTCGCCGGCCGCGCAGGTGGATCTACTCACGCTC------ 345
                                        **************************  *******      


avrBs3               AGCCAGCAGCAACAGGAGAAGATCAAACCGAAGGTTCGTTCGACAGTGGCGCAGCACCAC 540
bls256_tal2g         AGTCAGCAGCAGCAAGAGAAGATCAAACCGAATGTGCGTTCGACAGTGGCGCAGCACCAC 540
avrXa27              AGTCAGCAGCAGCAAGAGAAGATCAAATCGAAGGTGCGTTCGACAGTGGCGCAGCACCAC 540
arp3                 ---------------------------------------GCGACAGTGGCGCAGCACCAC 366
pxo99a_tal3a         ---------------------------------------GCGACAGTGGCGCAGCACCAC 366
pxo86_tal3           ---------------------------------------GCGACAGTGGCGCAGCACCAC 366
bls256_tal2h         ---------------------------------------GCGACAGTGGCGCAGCACCAC 366
rs105_tal            ---------------------------------------GCGACAGTGGCGCAGCACCAC 366
jsb2-24_tal          ---------------------------------------GCGACAGTGGCGCAGCACCAC 366
pxo86_tal6           ---------------------------------------GCGACAGTGGCGCAGCACCAC 366
pxo99a_tal3b         ---------------------------------------GCGACAGTGGCGCAGCACCAC 366
maff311018_tal5      ---------------------------------------GCGACAGTGGCGCAGCACCAC 366
                                                             ********************

avrBs3               GAGGCACTGGTCGGCCATGGGTTTACACACGCGCACATCGTTGCGCTCAGCCAACACCCG 600
bls256_tal2g         GAGGCACTGGTGGGCCATGGGTTTACACACGCGCACATCGTTGCGCTCAGCCAACACCCG 600
avrXa27              GAGGCACTGGTGGGCCATGGGTTTACACACGCGCACATCGTTGCGCTCAGCCAACACCCG 600
arp3                 GAGGCACTGGTGGGCCATGGGTTTACACACGCGCACATCGTTGCGCTCAGCCAACACCCG 426
pxo99a_tal3a         GAGGCACTGGTGGGCCATGGGTTTACACACGCGCACATCGTTGCGCTCAGCCAACACCCG 426
pxo86_tal3           GAGGCACTGGTGGGCCATGGGTTTACACACGCGCACATCGTTGCGCTCAGCCAACACCCG 426
bls256_tal2h         GAGGCACTGGTGGGCCATGGGTTTACACACGCGCACATCGTTGCGCTCAGCCAACACCCG 426
rs105_tal            GAGGCACTGGTGGGCCATGGGTTTACACACGCGCACATCGTTGCGCTCAGCCAACACCCG 426
jsb2-24_tal          GAGGCACTGGTGGGCCATGGGTTTACACACGCGCACATCGTTGCGCTCAGCCAACACCCG 426
pxo86_tal6           GAGGCACTGGTGGGCCATGGGTTTACACACGCGCACATCGTTGCGCTCAGCCAACACCCG 426
pxo99a_tal3b         GAGGCACTGGTGGGCCATGGGTTTACACACGCGCACATCGTTGCGCTCAGCCAACACCCG 426
maff311018_tal5      GAGGCACTGGTGGGCCATGGGTTTACACACGCGCACATCGTTGCGCTCAGCCAACACCCG 426
                     *********** ************************************************

avrBs3               GCAGCGTTAGGGACCGTCGCTGTCAAGTATCAGGACATGATCGCAGCGTTGCCAGAGGCG 660
bls256_tal2g         GCAGCGTTAGGGACCGTTGCTGTCACGTATCAGCACATAATCACGGCGTTGCCAGAGGCG 660
avrXa27              GCAGCGTTAGGGACCGTCGCTGTCAAGTATCAGCACATAATCACGGCGTTGCCAGAGGCG 660
arp3                 GCAGCGTTAGGGACCGTTGCTGTCACGTATCAAGACATAATCACGGCGTTGCCAGAGGCG 486
pxo99a_tal3a         GCAGCGTTAGGGACCGTTGCTGTCACGTATCAAGACATAATCACGGCGTTGCCAGAGGCG 486
pxo86_tal3           GCAGCGTTAGGGACCGTTGCTGTCACGTATCAAGACATAATCACGGCGTTGCCAGAGGCG 486
bls256_tal2h         GCAGCGTTAGGGACCGTTGCTGTCATGTATCAGCACATAATCACGGCGTTGCCAGAGGCG 486
rs105_tal            GCAGCGTTAGGGACCGTTGCTGTCATGTATCAGCACATAATCACGGCGTTGCCAGAGGCG 486
jsb2-24_tal          GCAGCGTTAGGGACCGTTGCTGTCATGTATCAAGACATAATCACGGCGTTGCCAGAGGCG 486
pxo86_tal6           GCAGCGTTAGGGACCGTTGCTGTCACGTATCAAGACATAATCACGGCGTTGCCAGAGGCG 486
pxo99a_tal3b         GCAGCGTTAGGGACCGTTGCTGTCACGTATCAAGACATAATCACGGCGTTGCCAGAGGCG 486
maff311018_tal5      GCAGCGTTAGGGACCGTTGCTGTCACGTATCAAGACATAATCACGGCGTTGCCAGAGGCG 486
                     ***************** ******* ******  **** *** * ***************

avrBs3               ACACACGAAGCGATCGTTGGCGTCGGCAAACAGTGGTCCGGCGCACGCGCTCTGGAGGCC 720
bls256_tal2g         ACACACGAAGACATCGTTGGCGTCGGCAAACAGTGGTCCGGCGCACGCGCCCTGGAGGCC 720
avrXa27              ACACACGAAGACATCGTTGGCGTCGGCAAACAGTGGTCCGGCGCACGCGCCCTGGAGGCC 720
arp3                 ACACACGAAGACATCGTTGGCGTCGGCAAACAGTTGTCCGGCGCACGCGCCCTGGAGGCC 546
pxo99a_tal3a         ACACACGAAGACATCGTTGGCGTCGGCAAACAGTTGTCCGGCGCACGCGCCCTGGAGGCC 546
pxo86_tal3           ACACACGAAGACATCGTTGGCGTCGGCAAACAGTTGTCCGGCGCACGCGCCCTGGAGGCC 546
bls256_tal2h         ACACACGAAGACATCGTTGGCGTCGGCAAACAGTTGTCCGACGCACGCGCCCTGGAGGCC 546
rs105_tal            ACACACGAAGACATCGTTGGCGTCGGCAAACAGTTGTCCGACGCACGCGCCCTGGAGGCC 546
jsb2-24_tal          ACACACGAAGACATCGTTGGCGTCGGCAAACAGTTGTCCGGCGCACGCGCCCTGGAGGCC 546
pxo86_tal6           ACACACGAAGACATCGTTGGCGTCGGCAAACAGTTGTCCGGCGCACGCGCCCTGGAGGCC 546
pxo99a_tal3b         ACACACGAAGACATCGTTGGCGTCGGCAAACAGTTGTCCGGCGCACGCGCCCTGGAGGCC 546
maff311018_tal5      ACACACGAAGACATCGTTGGCGTCGGCAAACAGTTGTCCGGCGCACGCGCCCTGGAGGCC 546
                     **********  ********************** ***** ********* *********


avrBs3               TTGCTCACGGTGGCGGGAGAGTTGAGAGGTCCACCGTTACAGTTGGACACAGGCCAACTT 780
bls256_tal2g         TTGCTCGCGGATGCGGGGGAGTTGAGAGGTCCGCCGTTACAGTTGGACACAGGCCAACTT 780
avrXa27              TTGCTCACGAAGGCGGGGGAGTTGAGAGGTCCGCCGTTACAGTTGGACACAGGCCAACTT 780
arp3                 TTGCTCACGAAGGCGGGGGAGTTGAGAGGTCCGCCGTTACAGTTGGACACAGGCCAACTT 606
pxo99a_tal3a         TTGCTCACGAAGGCGGGGGAGTTGAGAGGTCCGCCGTTACAGTTGGACACAGGCCAACTT 606
pxo86_tal3           TTGCTCACGAAGGCGGGGGAGTTGAGAGGTCCGCCGTTACAGTTGGACACAGGCCAACTT 606
bls256_tal2h         TTGCTCACGAAGGCGGGGGAGTTGAGAGGTCCGCCGTTACAGTTGGACACAGGCCAACTT 606
rs105_tal            TTGCTCACGAAGGCGGGGGAGTTGAGAGGTCCGCCGTTACAGTTGGACACAGGCCAACTT 606
jsb2-24_tal          TTGCTCACGAAGGCGGGGGAGTTGAGAGGTCCGCCGTTACAGTTGGACACAGGCCAACTT 606
pxo86_tal6           TTGCTCACGAAGGCGGGGGAGTTGAGAGGTCCGCCGTTACAGTTGGACACAGGCCAACTT 606
pxo99a_tal3b         TTGCTCACGAAGGCGGGGGAGTTGAGAGGTCCGCCGTTACAGTTGGACACAGGCCAACTT 606
maff311018_tal5      TTGCTCACGAAGGCGGGGGAGTTGAGAGGTCCGCCGTTACAGTTGGACACAGGCCAACTT 606
                     ****** **   ***** ************** ***************************

avrBs3               CTCAAGATTGCAAAACGTGGCGGCGTGACCGCAGTGGAGGCAGTGCATGCATGGCGCAAT 840
bls256_tal2g         CTCAAGATTGCAAAACGTGGCGGCGTGACCGCAGTGGAGGCAGTGCATGCATCGCGCAAT 840
avrXa27              CTCAAGATTGCAAAACGTGGCGGCGTGACCGCAGTGGAGGCAGTGCATGCATCGCGCAAT 840
arp3                 CTCAAGATTGCAAGACGTGGCGGCGTGACCGCAGTGGAGGCAGTGCATGCATGGCGCAAT 666
pxo99a_tal3a         CTCAAGATTGCAAGACGTGGCGGCGTGACCGCAGTGGAGGCAGTGCATGCATGGCGCAAT 666
pxo86_tal3           CTCAAGATTGCAAGACGTGGCGGCGTGACCGCAGTGGAGGCAGTGCATGCATGGCGCAAT 666
bls256_tal2h         CTCAAGATTGCAAGACGTGGCGGCGTGACCGCAGTGGAGGCAGTGCATGCATGGCGCAAT 666
rs105_tal            CTCAAGATTGCAAGACGTGGCGGCGTGACCGCAGTGGAGGCAGTGCATGCATGGCGCAAT 666
jsb2-24_tal          CTCAAGATTGCAAGACGTGGCGGCGTGACCGCAGTGGAGGCAGTGCATGCATGGCGCAAT 666
pxo86_tal6           CTCAAGATTGCAAGACGTGGCGGCGTGACCGCAGTGGAGGCAGTGCATGCATGGCGCAAT 666
pxo99a_tal3b         CTCAAGATTGCAAGACGTGGCGGCGTGACCGCAGTGGAGGCAGTGCATGCATGGCGCAAT 666
maff311018_tal5      CTCAAGATTGCAAGACGTGGCGGCGTGACCGCAGTGGAGGCAGTGCATGCATGGCGCAAT 666
                     ************* ************************************** *******

avrBs3               GCACTGACGGGTGCCCCCCTGAAC 864
bls256_tal2g         GCACTGACGGGTGCCCCCCTGAAC 864
avrXa27              GCACTGACGGGTGCCCCCCTGAAC 864
arp3                 GCACTGACGGGTGCCCCCCTGAAC 690
pxo99a_tal3a         GCACTGACGGGTGCCCCCCTGAAC 690
pxo86_tal3           GCACTGACGGGTGCCCCCCTGAAC 690
bls256_tal2h         GCACTGACGGGTGCCCCCCTGAAC 690
rs105_tal            GCACTGACGGGTGCCCCCCTGAAC 690
jsb2-24_tal          GCACTGACGGGTGCCCCCCTGAAC 690
pxo86_tal6           GCACTGACGGGTGCCCCCCTGAAC 690
pxo99a_tal3b         GCACTGACGGGTGCCCCCCTGAAC 690
maff311018_tal5      GCACTGACGGGTGCCCCCCTGAAC 690
                     ************************
