# Supplementary material
Source: publisher figshare collection journal article supplement (https://microbiology.figshare.com/articles/dataset/_/1545552)
Supplement: Supplementary file 1 [file 1 › File_S9_5_transposon_alignment.rtf]

Supplementary Material 
for

SMRT SEQUENCING OF XANTHOMONAS ORYZAE GENOMES REVEALS A DYNAMIC STRUCTURE AND COMPLEX TAL EFFECTOR GENE RELATIONSHIPS
Nicholas J. Booher1, Sara C. D. Carpenter1, Robert P. Sebra2, Li Wang1, Steven L. Salzberg3, Jan E. Leach4, and Adam J. Bogdanove1*
Address: 1 Plant Pathology and Plant-Microbe Biology Section, School of Integrative Plant Science, Cornell University, Ithaca, NY 14853 USA; 2 Icahn Institute for Genomics and Multiscale Biology and Department of Genetics & Genomic Sciences, Icahn School of Medicine at Mount Sinai, New York, NY 10029 USA; 3 Departments of Biomedical Engineering, Computer Science, and Biostatistics and Center for Computational Biology, Johns Hopkins University, Baltimore, MD 21205 USA; 4 Bioagricultural Sciences and Pest Management, Colorado State University, Ft. Collins, CO 80523 USA
*Corresponding author:  ajb7@cornell.edu


File S9. The 5' end of tal11g of CFBP7342.  Sequences of the 5' ends of the archetypal X. euvesicatoria avrBs3 gene, the BLS256 tal2g gene (representing Xoc tal genes), and avrXa27 (representing Xoo tal genes) are shown for comparison. Genbank accessions for sequences included in the alignment are given in the legend to File S6.

avrBs3               ATGGATCCCATTCGTTCGCGCACACCAAGTCCTGCCCGCGAGCTTCTGCCCGGACCCCAA 60
bls256_tal2g         ATGGATCCCATTCGTCCGCGCAGGCCAAGTCCTGCCCGCGAGCCTCTGCCCGGACCCCAA 60
avrXa27              ATGGATCCCATTCGTTCGCGCACGCCAAGTCCTGCCCGCGAGCTTCTGCCCGGACCCCAA 60
cfbp7342_tal11g      ATGGATCCCATTCGTCCGCGCAGGCCAAGTCCTGCCCGCGAGCTTCTGCCCGGACCCCAA 60
                     *************** ******  ******************* ****************

avrBs3               CCCGATGGGGTTCAGCCGACTGCAGATCGTGGGGTGT-CTCCGCCTGCCGGCGGCCCCCT 119
bls256_tal2g         CCGGATGGGGTTCAGCCGACTGCAGATCGGGGGGTGT-CTGCGCCTGCTGGCGGCCCTCT 119
avrXa27              CCGGATAGGGTTCAGCCGACTGCAGATCGGGGGGGGG-CTCCGCCTGCTGGCGGCCCCCT 119
cfbp7342_tal11g      CCGGATAGGATTCAGCCGACTGCAGATCGGGGGGGGGGCTCCGCCTGCTGGCGGCCCCCT 120
                     ** *** ** ******************* **** *  ** ******* ******** **

avrBs3               GGATGGCTTGCCCGCTCGGCGGACGATGTCCCGGACCCGGCTGCCATCTCCCCCTGCCCC 179
bls256_tal2g         GGATGGTTTGCCCGCTCGGCGGACGATGTCCCGGACCCGGCTGCCATCTCCCCCTGCGCC 179
avrXa27              GGATGGCTTGCCCGCTCGGCGGACGATGTCCCGGACCCGGCTGCCATCTCCCCCTGCGCC 179
cfbp7342_tal11g      GGATGGCTTGCCCGCTCGGCGGACGATGTCCCGGACCCGGCTGCCATCTCCCCCTGCGCC 180
                     ****** ************************************************** **

avrBs3               CTCACCTGCGTTCTCGGCGGGCAGCTTCAGTGACCTGTTACGTCAGTTCGATCCGTCACT 239
bls256_tal2g         CTCGCCTGCGTTCTCGGCGGGCAGCTTCAGCGATCTGCTCCGTCCGTTCGATCCGTCGCT 239
avrXa27              CTCGCCTGCGTTCTCGGCGGGCAGCTTCAACGATCTGCTCCGTCAGTTCGATCCGTCGCT 239
cfbp7342_tal11g      CTCGCCTGCGTTCTCGGCGGGCAGCTTCAGCGATCTGCTCCGTCCGTTCGATCCGTCGCT 240
                     *** *************************  ** *** * **** ************ **

avrBs3               T----------------------------------------------------------- 240
bls256_tal2g         T----------------------------------------------------------- 240
avrXa27              T----------------------------------------------------------- 240
cfbp7342_tal11g      TCGACGTCCCCCCGAGTTTGAGTAGCACCTTGGTTTGGAGTCCAATTCCCTACCCCGAGG 300
                     *                                                           

avrBs3               ------------------------------------------------------------
bls256_tal2g         ------------------------------------------------------------
avrXa27              ------------------------------------------------------------
cfbp7342_tal11g      AGATTGGACGTGAAGAAGCGTTTTTCCGAAGAACAGATCATCGGCTTCCTGCGCGAAGCC 360
                                                                                 

avrBs3               ------------------------------------------------------------
bls256_tal2g         ------------------------------------------------------------
avrXa27              ------------------------------------------------------------
cfbp7342_tal11g      GAGGCCGGCATGCCGATCAAGGACCTGTGCCGGCGGCATGGCTTCAGTGAGGCCTCGTAC 420
                                                                                 

avrBs3               ------------------------------------------------------------
bls256_tal2g         ------------------------------------------------------------
avrXa27              ------------------------------------------------------------
cfbp7342_tal11g      TACCTGTGGCGCAGTAAGTTCGGCGGCATGAGCGTGCCCGATGCCAAGCGGCTCAAGGAC 480
                                                                                 

avrBs3               ------------------------------------------------------------
bls256_tal2g         ------------------------------------------------------------
avrXa27              ------------------------------------------------------------
cfbp7342_tal11g      CTGGAGGCCGAGAACACGCGGCTGAAGAAGTTGCTGGCCGAGCAGGTGTTCCAGAACGAC 540
                                                                                 

avrBs3               ------------------------------------------------------------
bls256_tal2g         ------------------------------------------------------------
avrXa27              ------------------------------------------------------------
cfbp7342_tal11g      CTGATCAAGGATGCGCTGCAAAAAAAATGGTGAGCGCACCGGCGCGTCGTGCGCTGGTGC 600
                                                                                 


avrBs3               ------------------------------------------------------------
bls256_tal2g         ------------------------------------------------------------
avrXa27              ------------------------------------------------------------
cfbp7342_tal11g      GCGAGTGGATCGAAGGTGGCGCCAGCGAGCGCTGCGCCCTGGCGGCGATCGGCATGAGCG 660
                                                                                 

avrBs3               ------------------------------------------------------------
bls256_tal2g         ------------------------------------------------------------
avrXa27              ------------------------------------------------------------
cfbp7342_tal11g      CCAGTGCGCTGCGCTATCGCCCGCGCGAGGACCGCAACGTTGAGCTGCGCGAGCGCATCC 720
                                                                                 

avrBs3               ------------------------------------------------------------
bls256_tal2g         ------------------------------------------------------------
avrXa27              ------------------------------------------------------------
cfbp7342_tal11g      TTGCGTTGGCGCATCGCCATCGCCGCTATGGCGTGGGGATGATCTATCTCAAGCTGCGGC 780
                                                                                 

avrBs3               ------------------------------------------------------------
bls256_tal2g         ------------------------------------------------------------
avrXa27              ------------------------------------------------------------
cfbp7342_tal11g      AGGAAGGTCGTCTGGTGAACTATAAGCGGGTGGAGCGGCTGTATTGCGAGCAGCAGCTGC 840
                                                                                 

avrBs3               ------------------------------------------------------------
bls256_tal2g         ------------------------------------------------------------
avrXa27              ------------------------------------------------------------
cfbp7342_tal11g      AGGTCCGCCGCCGCAAGCGCAAAAAGGTGCCGGTTGGCGAGCGTGCACCGTTGCTGCGGC 900
                                                                                 

avrBs3               ------------------------------------------------------------
bls256_tal2g         ------------------------------------------------------------
avrXa27              ------------------------------------------------------------
cfbp7342_tal11g      CCACCAAGGCCAACCAGGTGTGGTCGATGGACTTCGTGTTCGACCGCACCGCCGAAGGTC 960
                                                                                 

avrBs3               ------------------------------------------------------------
bls256_tal2g         ------------------------------------------------------------
avrXa27              ------------------------------------------------------------
cfbp7342_tal11g      GGGCGATCAAGTGTCTGGTGATCGTGGACGACGCAACCCACGAAGCGGTCGCCATCGAGG 1020
                                                                                 

avrBs3               ------------------------------------------------------------
bls256_tal2g         ------------------------------------------------------------
avrXa27              ------------------------------------------------------------
cfbp7342_tal11g      TCGAACGCGCCATCTCCGGCCACGGCGTTGCGCGCGTGCTGGATCGGTTGGCACACAGTC 1080
                                                                                 

avrBs3               ------------------------------------------------------------
bls256_tal2g         ------------------------------------------------------------
avrXa27              ------------------------------------------------------------
cfbp7342_tal11g      GCGGCCTGCCGAAGATGATCCGCACGGACAACGGCAAGGAGTTCTGTGGCAAGGCCATGG 1140
                                                                                 

avrBs3               ------------------------------------------------------------
bls256_tal2g         ------------------------------------------------------------
avrXa27              ------------------------------------------------------------
cfbp7342_tal11g      TCGCCTGGGCGCATGCCAATCGTGTGCAGCTACGCCAGATCCAGCCTGGCAAGCCGAACC 1200
                                                                                 


avrBs3               ------------------------------------------------------------
bls256_tal2g         ------------------------------------------------------------
avrXa27              ------------------------------------------------------------
cfbp7342_tal11g      AGAATGCCTATGTCGAATCCTTCAACGGCCGGCTGCGCGACGAATGCCTCAACGAACACT 1260
                                                                                 

avrBs3               ------------------------------------------------------------
bls256_tal2g         ------------------------------------------------------------
avrXa27              ------------------------------------------------------------
cfbp7342_tal11g      GGTTCCCAACGCTGCTGCATGCGCGCACCGAGATCGAACGCTGGCGCCGCGAATACAACG 1320
                                                                                 

avrBs3               ------------------------------------------------------------
bls256_tal2g         ------------------------------------------------------------
avrXa27              ------------------------------------------------------------
cfbp7342_tal11g      AGGACCGACCCAAGAAAGCAATCGGCGCAATGACGCCGGCGGCCTATGCCCAGCAGTTGG 1380
                                                                                 

avrBs3               ------------------------------------------------------------
bls256_tal2g         ------------------------------------------------------------
avrXa27              ------------------------------------------------------------
cfbp7342_tal11g      CCAATAGCGATATCATCAACCCCGGACTCTAAACCCGACTGCTACTCAGGATGGGGGGAC 1440
                                                                                 

avrBs3               --------TTTAATACATCGCTTTTTGATTCATTGCCTCCCTTCGGCGCTCACCATACAG 292
bls256_tal2g         --------CTTGATACATCGCTTCTTGATTCGATGCCTGCCGTCGGCACGCCGCATACAG 292
avrXa27              --------CTTGATACATCGCTTCTTGATTCGATGCCTGCCGTCGGCACGCCGCATACAG 292
cfbp7342_tal11g      GTCGGCTTCTTGATACATCGCTTCTTGATTCGATGCCTGCCGTCGGCACGCCGCATACAG 1500
                              ** *********** *******  ***** ** ***** * *  *******

avrBs3               AGGCTGCCACAGGCGAGTGGGATGAGGTGCAATCGGGTCTGCGGGCAGCCGACGCCCCCC 352
bls256_tal2g         CGGCTGCCCCAGCAGAGTGGGATGAGGCGCAATCGGGTCTGCGTGCAGCCGATGACCCGC 352
avrXa27              CGGCTGCCCCAGCAGAGTGGGATGAGGTGCAATCGGGTCTGCGTGCAGCCGATGACCCGC 352
cfbp7342_tal11g      CGGCTGCCCCAGCAGAGTGGGATGAGGTGCAATCGGCTCTGCGTGCAGCCGATGACCCGC 1560
                      ******* ***  ************* ******** ****** ******** * *** *

avrBs3               CACCCACCATGCGCGTGGCTGTCACTGCCGCGCGGCCGCCGCGCGCCAAGCCGGCGCCGC 412
bls256_tal2g         CACCCACCGTGCGTGTCGCTGTCACTGCCGCGCGGCCGCCGCGCGCCAAGCCGGCCCCGC 412
avrXa27              CACCCACCGTGCGTGTCGCTGTCACTGCCGCGCGGCCGCCGCGCGCCAAGCCGGCCCCGC 412
cfbp7342_tal11g      CACCCACCGTGCGTGTCGCTGTCACTGCCGCGCGGCCGCCGCGCGCCAAGCCGGCCCCGC 1620
                     ******** **** ** ************************************** ****

avrBs3               GACGACGTGCTGCGCAACCCTCCGACGCTTCGCCGGCCGCGCAGGTGGATCTACGCACGC 472
bls256_tal2g         GACGGCGTGCGGCGCAACCCTCCGACGCTTCGCCGGCCGCGCAGGTGGATCTAAGCACGC 472
avrXa27              GACGGCGTGCGGCGCAACCCTCCGACGCTTCGCCGGCCGCGCAGGTGGATCTACGCACGC 472
cfbp7342_tal11g      GACGGCGTGCGGCGCAACCCTCCGACGCTTCGCCGGCCGCGCAGGTGGATCTACGCACGC 1680
                     **** ***** ****************************************** ******

avrBs3               TCGGCTACAGCCAGCAGCAACAGGAGAAGATCAAACCGAAGGTTCGTTCGACAGTGGCGC 532
bls256_tal2g         TCGGCTACAGTCAGCAGCAGCAAGAGAAGATCAAACCGAATGTGCGTTCGACAGTGGCGC 532
avrXa27              TCGGCTACAGTCAGCAGCAGCAAGAGAAGATCAAATCGAAGGTGCGTTCGACAGTGGCGC 532
cfbp7342_tal11g      TCGGCTACAGTCAGCAGCAGCAAGAGAAGATCGAACCGAATGTTCGTTCGACAGTTGCGC 1740
                     ********** ******** ** ********* ** **** ** *********** ****

avrBs3               AGCACCACGAGGCACTGGTCGGCCATGGGTTTACACACGCGCACATCGTTGCGCTCAGCC 592
bls256_tal2g         AGCACCACGAGGCACTGGTGGGCCATGGGTTTACACACGCGCACATCGTTGCGCTCAGCC 592
avrXa27              AGCACCACGAGGCACTGGTGGGCCATGGGTTTACACACGCGCACATCGTTGCGCTCAGCC 592
cfbp7342_tal11g      AGCACCACGAGGCACTGGTGGGCCATGGGTTTACACACGCGCACATCGTTGCGCTCAGCC 1800
                     ******************* ****************************************


avrBs3               AACACCCGGCAGCGTTAGGGACCGTCGCTGTCAAGTATCAGGACATGATCGCAGCGTTGC 652
bls256_tal2g         AACACCCGGCAGCGTTAGGGACCGTTGCTGTCACGTATCAGCACATAATCACGGCGTTGC 652
avrXa27              AACACCCGGCAGCGTTAGGGACCGTCGCTGTCAAGTATCAGCACATAATCACGGCGTTGC 652
cfbp7342_tal11g      GACACCCGGCAGCGTTAGGGACCGTCGCTGTCACGTATCAAGACATAATCACGGCGTTGC 1860
                      ************************ ******* ******  **** *** * *******

avrBs3               CAGAGGCGACACACGAAGCGATCGTTGGCGTCGGCAAACAGTGGTCCGGCGCACGCGCTC 712
bls256_tal2g         CAGAGGCGACACACGAAGACATCGTTGGCGTCGGCAAACAGTGGTCCGGCGCACGCGCCC 712
avrXa27              CAGAGGCGACACACGAAGACATCGTTGGCGTCGGCAAACAGTGGTCCGGCGCACGCGCCC 712
cfbp7342_tal11g      CAGAGGCGACACACGAAGACATCGTTGGCGTCGGCAAACAGTGGTCCGGCGCACGCGCCC 1920
                     ******************  ************************************** *

avrBs3               TGGAGGCCTTGCTCACGGTGGCGGGAGAGTTGAGAGGTCCACCGTTACAGTTGGACACAG 772
bls256_tal2g         TGGAGGCCTTGCTCGCGGATGCGGGGGAGTTGAGAGGTCCGCCGTTACAGTTGGACACAG 772
avrXa27              TGGAGGCCTTGCTCACGAAGGCGGGGGAGTTGAGAGGTCCGCCGTTACAGTTGGACACAG 772
cfbp7342_tal11g      TGGAGGCCTTGCTCACGGTGGCGGGAGAGTTGAGAGGTCCACCGTTGCAGTTGGACACAG 1980
                     ************** **   ***** ************** ***** *************

avrBs3               GCCAACTTCTCAAGATTGCAAAACGTGGCGGCGTGACCGCAGTGGAGGCAGTGCATGCAT 832
bls256_tal2g         GCCAACTTCTCAAGATTGCAAAACGTGGCGGCGTGACCGCAGTGGAGGCAGTGCATGCAT 832
avrXa27              GCCAACTTCTCAAGATTGCAAAACGTGGCGGCGTGACCGCAGTGGAGGCAGTGCATGCAT 832
cfbp7342_tal11g      GCCAACTTGTCAAGATTGCAAAACGTGGCGGCGTGACCGCAGTGGAGGCAGTGCATGCAT 2040
                     ******** ***************************************************

avrBs3               GGCGCAATGCACTGACGGGTGCCCCCCTGAAC 864
bls256_tal2g         CGCGCAATGCACTGACGGGTGCCCCCCTGAAC 864
avrXa27              CGCGCAATGCACTGACGGGTGCCCCCCTGAAC 864
cfbp7342_tal11g      CGCGCAATGCACTGACGGGTGCCCCCCTGAAC 2072
                      *******************************
